# Supplementary material for: Acceptability of chronic liver disease screening in a UK primary care setting: a qualitative evaluation
Source: PubMed Central journal article supplement — BMJ Open. 2020 Nov 18;10(11):e041574. doi: 10.1136/bmjopen-2020-041574 (PMC7677335; doi:10.1136/bmjopen-2020-041574), 2020-11-18
Supplement: bmjopen-2020-041574.draft_revisions.pdf [file bmjopen-2020-041574.draft_revisions.pdf]

# BMJ Open

BMJ Open is committed to open peer review. As part of this commitment we make the peer review history of every article we publish publicly available.

When an article is published we post the peer reviewers' comments and the authors' responses online. We also post the versions of the paper that were used during peer review. These are the versions that the peer review comments apply to.

The versions of the paper that follow are the versions that were submitted during the peer review process. They are not the versions of record or the final published versions. They should not be cited or distributed as the published version of this manuscript.

BMJ Open is an open access journal and the full, final, typeset and author-corrected version of record of the manuscript is available on our site with no access controls, subscription charges or pay-per-view fees (<http://bmjopen.bmj.com>).

If you have any questions on BMJ Open's open peer review process please email [info.bmjopen@bmj.com](mailto:info.bmjopen@bmj.com)

# BMJ Open

## Acceptability of chronic liver disease screening in primary care: A qualitative evaluation

|                               |                                                                                                                                                                                                                                                                                                                                                                                                                                                                                                                                                                                                                                                                                                                                                                                                                                                                                                                                                          |
|-------------------------------|----------------------------------------------------------------------------------------------------------------------------------------------------------------------------------------------------------------------------------------------------------------------------------------------------------------------------------------------------------------------------------------------------------------------------------------------------------------------------------------------------------------------------------------------------------------------------------------------------------------------------------------------------------------------------------------------------------------------------------------------------------------------------------------------------------------------------------------------------------------------------------------------------------------------------------------------------------|
| Journal:                      | <i>BMJ Open</i>                                                                                                                                                                                                                                                                                                                                                                                                                                                                                                                                                                                                                                                                                                                                                                                                                                                                                                                                          |
| Manuscript ID                 | bmjopen-2020-041574                                                                                                                                                                                                                                                                                                                                                                                                                                                                                                                                                                                                                                                                                                                                                                                                                                                                                                                                      |
| Article Type:                 | Original research                                                                                                                                                                                                                                                                                                                                                                                                                                                                                                                                                                                                                                                                                                                                                                                                                                                                                                                                        |
| Date Submitted by the Author: | 12-Jun-2020                                                                                                                                                                                                                                                                                                                                                                                                                                                                                                                                                                                                                                                                                                                                                                                                                                                                                                                                              |
| Complete List of Authors:     | <p>Knight, Holly; University of Nottingham, Division of Epidemiology and Public Health</p> <p>Harman, David; Nottingham Digestive Diseases Centre, University of Nottingham</p> <p>Morling, Joanne; University of Nottingham, Division of Epidemiology and Public Health; NIHR Nottingham Biomedical Research Centre, Nottingham University Hospitals</p> <p>Aithal, Guruprasad; Nottingham Digestive Diseases Centre, University of Nottingham; NIHR Nottingham Biomedical Research Centre, Nottingham University Hospitals</p> <p>Card, Timothy; University of Nottingham, Division of Epidemiology and Public Health; Nottingham Digestive Diseases Centre, University of Nottingham</p> <p>Guha, Indra; Nottingham Digestive Diseases Centre, University of Nottingham; NIHR Nottingham Biomedical Research Centre, Nottingham University Hospitals</p> <p>Bains, Manpreet; University of Nottingham, Division of Epidemiology and Public Health</p> |
| Keywords:                     | PUBLIC HEALTH, QUALITATIVE RESEARCH, PRIMARY CARE                                                                                                                                                                                                                                                                                                                                                                                                                                                                                                                                                                                                                                                                                                                                                                                                                                                                                                        |
|                               |                                                                                                                                                                                                                                                                                                                                                                                                                                                                                                                                                                                                                                                                                                                                                                                                                                                                                                                                                          |

SCHOLARONE™  
Manuscripts

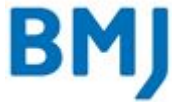

I, the Submitting Author has the right to grant and does grant on behalf of all authors of the Work (as defined in the below author licence), an exclusive licence and/or a non-exclusive licence for contributions from authors who are: i) UK Crown employees; ii) where BMJ has agreed a CC-BY licence shall apply, and/or iii) in accordance with the terms applicable for US Federal Government officers or employees acting as part of their official duties; on a worldwide, perpetual, irrevocable, royalty-free basis to BMJ Publishing Group Ltd ("BMJ") its licensees and where the relevant Journal is co-owned by BMJ to the co-owners of the Journal, to publish the Work in this journal and any other BMJ products and to exploit all rights, as set out in our [licence](#).

The Submitting Author accepts and understands that any supply made under these terms is made by BMJ to the Submitting Author unless you are acting as an employee on behalf of your employer or a postgraduate student of an affiliated institution which is paying any applicable article publishing charge ("APC") for Open Access articles. Where the Submitting Author wishes to make the Work available on an Open Access basis (and intends to pay the relevant APC), the terms of reuse of such Open Access shall be governed by a Creative Commons licence – details of these licences and which [Creative Commons](#) licence will apply to this Work are set out in our licence referred to above.

Other than as permitted in any relevant BMJ Author's Self Archiving Policies, I confirm this Work has not been accepted for publication elsewhere, is not being considered for publication elsewhere and does not duplicate material already published. I confirm all authors consent to publication of this Work and authorise the granting of this licence.

## ACCEPTABILITY OF CHRONIC LIVER DISEASE SCREENING IN PRIMARY CARE: A QUALITATIVE EVALUATION

### Authors

Holly Knight<sup>1</sup>, David Harman<sup>2</sup>, Joanne R Morling<sup>1,3</sup>, Guruprasad Aithal<sup>2,3</sup>, Timothy Card<sup>1,2</sup>, Indra Neil Guha<sup>2,3</sup>, Manpreet Bains<sup>1</sup>

Holly Knight BA, MA, PhD<sup>1</sup>

David Harman BMedSci, BMBS, MRCP, PhD<sup>2</sup>

Joanne R Morling FRCP, FFPH, PhD<sup>1,3</sup>

Professor Guruprasad Aithal BSc, MBBS, MD, DNB, FRCP, PhD<sup>2,3</sup>

Timothy Card FRCP, PhD<sup>1,2</sup>

Indra Neil Guha FRCP, PhD<sup>2,3</sup>

Manpreet Bains BSc, MSc, PhD<sup>1</sup>

### Affiliations

1. Division of Epidemiology and Public Health, School of Medicine, University of Nottingham, Clinical Sciences Building 2, City Hospital, Nottingham, UK, NG5 1PB
2. Nottingham Digestive Diseases Centre (NDDC), School of Medicine, University of Nottingham, Nottingham, UK, NG7 2UH
3. NIHR Nottingham Biomedical Research Centre (BRC), Nottingham University Hospitals NHS Trust and the University of Nottingham, Nottingham, UK, NG7 2UH

### Corresponding author:

Dr Holly Knight

Division of Epidemiology and Public Health, University of Nottingham

Clinical Sciences Building, City Hospital Campus, Hucknall Road, Nottingham, NG5 1PB

[Email: holly.knight@nottingham.ac.uk](mailto:holly.knight@nottingham.ac.uk)

Tel: 0115 823 1661

## Funding

GPA and ING are supported by the Gastrointestinal and Liver Disorder theme of the NIHR Nottingham Biomedical Research Centre (Reference no: BRC-1215-20003). DH received support from the Gastrointestinal and Liver Disorder theme of the NIHR Nottingham Biomedical Research Centre (Reference no: BRC-1215-20003) for the duration of this study. JRM and HK receive salary support from a Medical Research Council Clinician Scientist Fellowship [grant number MR/P008348/1]. Funding for the Nottingham liver disease stratification pathway has also been received from the East Midlands Academic Health Sciences Network.

**Ethical approval** was received from the East Midlands – Leicester Research Ethics Committee (13/EM/0123).

**Competing interests:** None

## ACCEPTABILITY OF CHRONIC LIVER DISEASE SCREENING IN PRIMARY CARE: A QUALITATIVE EVALUATION

### Abstract

#### Objectives

The increasing incidence of chronic liver disease (CLD) in the UK may be attributed to a rise in preventable risk factors, including hazardous alcohol use and type 2 diabetes. Transient elastography (TE) can rapidly stratify risk of CLD in primary care populations and provide an opportunity to raise patient awareness of risk factors. This study explores patient experiences of TE screening in a primary care setting. Additionally, patient awareness of CLD risk is explored.

#### Study design and setting

A qualitative process evaluation of a community-screening pathway for CLD (Nottingham, UK). Participants completed semi-structured interviews, which were audio-recorded, transcribed verbatim, and analysed thematically.

#### Participants

Twenty adults were purposively recruited six months to two years post-TE screening. Inclusion criteria included (1) hazardous alcohol use, (2) type 2 diabetes and/or (3) persistently elevated liver enzymes without known cause.

#### Results

Undergoing TE in primary care was seen as acceptable to most participants. Hazardous alcohol use was identified as the primary cause of CLD; no participants were aware of metabolic risk factors. TE improved understanding of personal risk factors and prompted contemplation of lifestyle change across all TE stratifications.

1  
2  
3 However, participants' perceptions of risk were altered by the healthcare providers'  
4 communication of TE scores.  
5  
6  
7

## 8 **Conclusions**

9  
10 High acceptability of TE, regardless of risk factor, provides strong support for  
11 inclusion of TE stratification in primary care. Findings highlight the positive impact of  
12 receiving TE on risk awareness. Future clinical iterations should improve the  
13 structure and communication of TE results to patients.  
14  
15  
16  
17  
18  
19  
20  
21

## 22 **Strengths and limitations of this study**

- 23  
24  
25  
26 • This study presents the first qualitative evaluation of patient experiences  
27 undergoing transient elastography screening in primary care for non-viral liver  
28 disease.  
29  
30  
31  
32 • Use of inductive analysis provides support for wider implementation of the  
33 screening pathway whilst identifying areas for improvement.  
34  
35  
36  
37 • Although participants were purposively sampled across urban and suburban  
38 primary care locations, there was limited ethnic diversity in the sample  
39 interviewed potentially limiting generalisability to non white-British populations.  
40  
41  
42  
43 • The interviewer was involved in a larger community study of the screening  
44 pathway which may have inadvertently impacted the findings.  
45  
46  
47  
48  
49  
50  
51  
52  
53  
54  
55  
56  
57  
58  
59  
60

## Introduction

Chronic liver disease (CLD) is the third most common cause of premature death in the UK, with mortality rates increasing by 400% since 1970(1). The rising incidence of CLD and associated increase in mortality is driven by a rise in risk factors, such as hazardous alcohol use and type 2 diabetes, and is therefore considered preventable(2,3). However, the largely asymptomatic nature of CLD means initial detection of the disease predominantly occurs following hospitalisation with decompensation, resulting in significantly impaired prognosis(4).

Traditional approaches to the identification of CLD in primary care settings demonstrate poor sensitivity(5). In a community population, abnormal liver enzymes were observed in approximately one fifth of patients tested over a five-year period (5). Despite this, detection of significant liver disease was remarkably low, occurring in only 1.14% of the sample(5). Conversely, normal liver enzyme results do not accurately exclude underlying CLD; approximately 88% of patients with non-alcoholic fatty liver disease (NAFLD) over the age of 65 years present with normal liver enzymes(6). To improve the accuracy of early liver disease detection, recent guidelines recommend the use of additional risk stratification tools, particularly in patients with a known history of harmful alcohol use or NAFLD(7).

Novel risk stratification approaches, such as transient elastography (TE), enable rapid identification of CLD in those who may be unaware of their illness(8). TE provides an immediate numerical value for liver stiffness, allowing feedback to patients regarding their risk of liver disease within the same appointment. Furthermore, the non-invasive nature of TE allows for rapid risk stratification that is readily deliverable in community settings(9). The Nottingham Community Liver Study was a large feasibility study that embedded portable TE devices (Fibroscan,



1  
2  
3 EchoSens, Paris, France) into two general practitioner (GP) practices in the  
4  
5 Rushcliffe borough of Nottingham, UK. The primary objective was to assess whether  
6  
7 inclusion of TE as a risk stratification tool could improve early identification of CLD.  
8  
9  
10 The combined patient population of both practices was 12,368, of whom 10% had  
11  
12 type 2 diabetes or harmful alcohol use as risk factors for CLD. TE screening of  
13  
14 patients with these risk factors led to a 140% increase in diagnoses of cirrhosis,  
15  
16 despite 90.9% of the cirrhotic patients having normal liver enzymes(9).  
17  
18

19  
20 Integration of TE into primary care settings has allowed for successful  
21  
22 identification of previously undetected CLD. However, prior to further  
23  
24 implementation, it is important to assess the acceptability of this intervention to  
25  
26 patients, including any barriers or enablers to uptake. This study presents a  
27  
28 qualitative process evaluation of the Nottingham Community Liver Study, exploring  
29  
30 the impact of undergoing TE in a primary care setting. We sought to understand  
31  
32 patient experiences of the delivery and process of TE screening for CLD, and the  
33  
34 broader impact of TE screening on patient risk awareness.  
35  
36  
37

## 38 **Methods**

### 39 **Study design and setting**

40  
41  
42 This was a qualitative process evaluation that used semi-structured interviews  
43  
44 to explore participants' experiences of CLD screening in primary care. Participants  
45  
46 were purposively sampled from a large cohort of patients who underwent  
47  
48 stratification of CLD in the community using a portable TE device (Fibroscan;  
49  
50 EchoSens, Paris), as part of the Nottingham Community Liver Study (Nottingham;  
51  
52 UK). A detailed description of this study and the recruitment processes has been  
53  
54 published previously(9). Briefly, patients with defined risk factors for development of  
55  
56 CLD were identified through electronic medical records and invited by their GPs to  
57  
58  
59  
60

1  
2  
3 attend a liver assessment at their GP practice. Risk factors included hazardous  
4 alcohol intake (defined as i) >14 units per week for women, > 21 units per week for  
5 men, ii) and/or presence of alcohol misuse READ code, iii) and/or AUDIT score > 8),  
6 type 2 diabetes, and/or persistently raised liver enzymes without known cause.  
7  
8 Patients were excluded if they showed evidence of hepatic fibrosis, cirrhosis, or  
9 metastatic malignancy from previous investigation, contraindications existed for  
10 performing TE (e.g. pregnancy, pacemakers), or severe cognitive impairment  
11 prevented consent(9,10). Sampling strata for invitation for interview were i) GP  
12 surgery location (suburban versus inner city), ii) CLD risk factor (hazardous alcohol  
13 use vs. type 2 diabetes), and iii) diagnosis assigned after community liver disease  
14 stratification (normal liver stiffness vs. liver fibrosis vs. liver cirrhosis). Patients were  
15 excluded from interview selection if they were unable to communicate in English.  
16  
17 Written consent was obtained following discussion with a trained research nurse.  
18  
19 Ethical approval was received from the East Midlands – Leicester Research Ethics  
20 Committee (13/EM/0123).  
21  
22  
23  
24  
25  
26  
27  
28  
29  
30  
31  
32  
33  
34  
35  
36  
37  
38  
39  
40

### 41 **Data collection and interview procedure**

42  
43 Interview questions were predominantly open-ended, allowing both the  
44 researcher and participant to pursue avenues of interest when these arose. Probes  
45 were used where necessary to expand upon participant responses. Both positive  
46 and negative views of the intervention were explored. The interview guide was  
47 reviewed by an independent researcher (MB) who has significant expertise in  
48 qualitative methodologies. The guide was piloted with a trained research nurse and  
49 the initial three participants for testing and refinement. Only minor amendments were  
50  
51  
52  
53  
54  
55  
56  
57  
58  
59  
60

1  
2  
3 made following the pilot, meaning the initial three participants were included in the  
4  
5 analysis.  
6

7  
8 Face-to-face interviews were conducted over a six month period by the  
9  
10 primary researcher (DH) with patients who had attended a TE assessment six  
11  
12 months to two years prior to data collection. Interviews took place either in the  
13  
14 participant's home (n=14) or an interview room at a tertiary care centre (n=6)  
15  
16 (participant choice). Participants were notified that their interview responses would  
17  
18 be anonymised. Interviews continued until data saturation was reached. Interviews  
19  
20 were digitally audio-recorded and transcribed verbatim by a specialist transcription  
21  
22 company.  
23  
24  
25

## 26 27 **Data analysis**

28  
29 Data was analysed thematically using an inductive approach(11). During the  
30  
31 first phase of analysis, DH conducted a preliminary scan of the data, allowing  
32  
33 generation of initial codes for data extracts. The analysis was then re-focussed to  
34  
35 sort and group the codes into analytical categories or 'themes'. A 'constant  
36  
37 comparative' method was used to compare individual data items with the rest of the  
38  
39 data, ensuring that the preliminary themes retained importance with additional  
40  
41 interviews(12). To ensure reliability of the coding system, MB independently coded  
42  
43 and compared five interview transcripts.  
44  
45  
46

47  
48 During the second phase, themes were refined to ensure data cohered  
49  
50 together meaningfully, whilst themes were clear and distinct. Themes were  
51  
52 reorganised and collapsed as required. Finally, a detailed analysis was conducted  
53  
54 for each theme and data excerpts were identified and assigned to illustrate the final  
55  
56 themes. All coding was checked by an independent researcher (MB) to ensure  
57  
58  
59  
60

1  
2  
3 validity. NVivo 11 (QSR International Ltd, Melbourne, Australia) was used as a data  
4  
5 management tool throughout the analysis process.  
6  
7

## 8 **Patient and public involvement**

9  
10 Patients and members of the public were not involved in the study design,  
11  
12 interpretation of results, or writing of the manuscript.  
13  
14  
15  
16  
17

## 18 **Results**

### 19 **Participants**

20  
21 In total 28 participants were invited for interview; 8 declined participation  
22  
23 whilst the remaining 20 participants completed the interview (mean length of  
24  
25 interview was 27.6 minutes; standard deviation 7.6; range 16-46 minutes). Mean  
26  
27 participant age was 57.9 years (standard deviation = 9.3; range 40-71 years), and 12  
28  
29 participants (60%) were male. Participants were adequately distributed across the  
30  
31 sampling strata (see Table 1).  
32  
33  
34  
35  
36  
37  
38  
39

40 Table 1. Demographic and clinical characteristics of interviewed patients (n=20)

41 \*TE result refers to diagnosis assigned on the basis of Transient Elastography (Fibroscan)  
42 reading of liver stiffness, and subsequent confirmatory tests for abnormal scan to determine  
43 whether cirrhosis was present. Normal TE result < 8 kPa; Abnormal – Fibrosis result = 8 –  
44 15 kPa; Abnormal – Cirrhosis result > 15 kPa  
45  
46  
47  
48

### 49 **Thematic analysis**

50  
51 Analysis of the interviews revealed three main themes and two corresponding  
52  
53 sub-themes. The themes herein follow the chronological order of patients'  
54  
55 experiences after referral for TE screening. Subthemes detail general acceptability,  
56  
57 comprehension, and impact of receiving TE results. Participant awareness of their  
58  
59  
60

1  
2  
3 risk for CLD prior to and following TE was also explored. The presenting risk factor,  
4 geographic location, and TE stratification are provided for each quoted participant.  
5  
6  
7  
8

### 9 **1. Experience of stratification pathway**

#### 10 **Acceptability and understanding of TE screening**

11  
12  
13 Motivation to attend the TE appointment was driven by both medical and  
14 emotional factors. Participants with hazardous alcohol use were not routinely part of  
15 a medical programme (i.e. diabetes management) prior to the current study.  
16  
17 Therefore, the invitation to undergo TE was unexpected and generated both surprise  
18 and anxiety in some individuals. However, in interviewed participants, this did not  
19 appear to preclude attendance for the TE appointment. Several participants  
20 discussed being accustomed to screening procedures as part of their routine  
21 diabetes care, and were happy to attend on the recommendation of the GP team  
22 alone. Other participants endorsed a desire to attend the TE scan to enable the early  
23 detection of a liver problem before it resulted in any significant symptoms.  
24  
25  
26  
27  
28  
29  
30  
31  
32  
33  
34  
35  
36  
37  
38

39 *I was okay because I wanted things finding out, if there was anything, you*  
40 *know, wrong with me*  
41  
42  
43

44 Participant 2, Type 2 Diabetes, Inner City GP, Liver Cirrhosis  
45  
46  
47

48 The majority of participants recalled a basic understanding of the TE device  
49 derived from either a leaflet provided prior to the appointment or the explanation  
50 provided by the nurses during the appointment. Several participants accurately  
51 described the use of TE to explore scarring in the liver and used terminology such as  
52 'rigidity', 'hardness' or 'stiffness'.  
53  
54  
55  
56  
57  
58  
59  
60

1  
2  
3 *The two nurses, they were very good and they explained how it worked and*  
4 *what happens to the test, so they explained it well, what it was measuring; it*  
5 *was the density of the liver, like an ultrasound, so they explained all that and*  
6 *they were very good.*  
7  
8  
9  
10  
11  
12

13 Participant 20, Hazardous Alcohol Use, Inner City GP, Normal liver scan  
14  
15

16 The process of being screened for CLD in a primary care setting was  
17 regarded as a positive experience by most. Many participants reported that being  
18 reviewed at their GP practice, rather than in a hospital setting, was convenient and  
19 allowed attendance outside of working hours. One participant also felt that  
20 attendance rates for liver scans in the community would be improved due to this  
21 convenience. For most participants, the rapidity of the screening was seen as  
22 surprising, whilst the TE scan itself was described as painless.  
23  
24  
25  
26  
27  
28  
29  
30  
31  
32

33 *It was all done in 20 minutes over and done with and it was not a problem at*  
34 *all, it was probably the easiest scan I've ever had, for anything! When they*  
35 *say "it's done", you think "already?". "It takes a bit longer than this to have an*  
36 *appointment with the GP".*  
37  
38  
39  
40  
41  
42  
43

44 Participant 16, Type 2 Diabetes, Inner City GP, Liver Fibrosis  
45  
46

47 One participant described the scan as an uncomfortable procedure, although  
48 later described the process of having a liver biopsy as comparatively more painful.  
49 Negative feedback was also expressed by one participant for whom it was not  
50 possible to obtain a valid liver assessment in the community. Although the participant  
51 felt that the concept of community liver scanning was a good idea, he did not feel  
52 that the process itself was well executed. This participant was subsequently referred  
53  
54  
55  
56  
57  
58  
59  
60

1  
2  
3 to secondary care for TE screening.  
4  
5

### 6 **Comprehension of results**

7  
8 Participant recall of their numerical liver stiffness value was inconsistent.  
9  
10 Several participants did not remember receiving a numeric result, whilst  
11  
12 approximately half of participants interviewed were still able to recall their exact liver  
13  
14 stiffness measurement. Participant preference for the format of their liver stiffness  
15  
16 result was also varied. Some participants felt that simple categorisation of their scan  
17  
18 result as normal or abnormal was informative enough. Other participants preferred a  
19  
20 numerical value as the result felt more personalised and provided a baseline for  
21  
22 comparison in case further scans were required.  
23  
24  
25  
26  
27  
28  
29

30  
31 *The terms “satisfactory”, “normal”, “good”, “very good”, “excellent”, they’re all*  
32  
33 *subjective, they mean different things to different people but a score is a*  
34  
35 *score, if you have a score of 6.1, it’s not 6.2 and neither is it 5.9, it’s a definite*  
36  
37 *starting point.*  
38  
39

40 Participant 5, Type 2 Diabetes, Suburban GP, Normal liver scan

41  
42  
43  
44 Several participants felt able to use the numerical liver stiffness result to  
45  
46 assess the severity of their liver disease. However, multiple participants described  
47  
48 feeling uncertain about how to interpret the severity of abnormal results as the  
49  
50 possible ranges and severities of liver stiffness results did not appear to be  
51  
52 consistently discussed during the screening.  
53  
54  
55

## 56 **2. Impact of screening result**

1  
2  
3 Most participants reported the expectation that liver abnormality would not be  
4 detected. This was derived from a number of factors, including a prior lack of  
5 knowledge regarding their own risk factor for developing CLD, the absence of  
6 knowledge regarding their own risk factor for developing CLD, the absence of  
7 previous symptoms, and in several participants previously normal liver function blood  
8 tests. Following delivery of the scan results, participants with normal liver stiffness  
9 described a sense of relief that a significant problem or additional comorbidity was  
10 not detected. Conversely, participants with elevated liver stiffness results commonly  
11 reported feeling surprised, shocked, or anxious. For those diagnosed with cirrhosis,  
12 most expressed concern that their disease would progress quickly or result in their  
13 premature death. However, several participants expressed relief following diagnosis  
14 with cirrhosis rather than an underlying malignancy.  
15  
16  
17  
18  
19  
20  
21  
22  
23  
24  
25  
26  
27  
28  
29  
30

31 *Everybody thinks there might be cancer there sometimes and it was just "oh*  
32 *it's not a cancer, it's that ... in another five years or so!*  
33  
34  
35

36 Participant 19, Type 2 Diabetes, Suburban GP, Liver Cirrhosis  
37  
38  
39  
40  
41

42 Provider delivery of the scan result appeared to contribute to the impact of the  
43 result. Specifically, several participants with fibrosis felt that the abnormality of their  
44 TE results did not represent a significant health issue because of the message  
45 conveyed by the health care provider conducting the scan. This resulted from the  
46 perception that mild elevations did not warrant concern:  
47  
48  
49  
50  
51  
52  
53

54 *They told me that mine was above but not serious. That's what they said it*  
55 *was. Nothing to worry about, it was above normal but "don't worry about it".*  
56  
57  
58  
59

60 Participant 9, Type 2 Diabetes, Inner City GP, Liver Fibrosis



1  
2  
3 The CLD screening process provided multiple opportunities to raise  
4 participant awareness of their liver health and fostered contemplation of potential  
5 lifestyle changes. Both hazardous alcohol users and participants with type 2 diabetes  
6 receiving normal liver stiffness results reported immediate contemplation of lifestyle  
7 changes. Participants with elevated liver stiffness discussed the abnormal result, and  
8 subsequent advice from the nursing team and liver specialist, as the initiator of  
9 contemplation of lifestyle change. Several participants discussed that being told they  
10 had an abnormal liver scan was a 'wake-up call' and subsequently prompted them to  
11 consider changes that could be made to their lifestyle.  
12  
13  
14  
15  
16  
17  
18  
19  
20  
21  
22  
23  
24

25  
26 ***What exactly was the trigger that got you thinking that you needed to do***  
27 ***something?***  
28

29  
30 *Having an abnormal test, no doubt about that. I think we all like to think we're*  
31 *perfect ...! If there's something wrong and you can do something about it,*  
32 *you're daft if you don't, that's the way I look at it.*  
33  
34  
35

36 Participant 9, Type 2 Diabetes, Inner City GP, Liver Fibrosis  
37  
38  
39  
40

41 As a marker of acceptability, all participants were willing to undergo further CLD  
42 screening in primary care, with most reporting that an interval of three to five years  
43 for repeated TE scans would be reasonable. Participants with normal liver stiffness  
44 felt it would be important to repeat the liver scan at a future interval, to ensure that no  
45 new abnormality had developed. For participants with abnormal liver stiffness, the  
46 most important reasons for repeating the TE scan were to monitor the liver in order  
47 to ensure that their CLD had not worsened, and to detect if improvements in lifestyle  
48 had resulted in subsequent improvements in liver stiffness.  
49  
50  
51  
52  
53  
54  
55  
56  
57  
58  
59  
60

### 3. Liver disease risk awareness

Participants discussed the impact that the risk stratification pathway had on their own risk awareness. Prior to undergoing TE in primary care, participant knowledge of CLD risk factors was relatively limited. Hazardous alcohol use was recognised to be an important cause of CLD by all bar one of the participants. This knowledge was acquired from a number of sources, including media reports on the risks of alcohol and personal experiences of hepatic cirrhosis in close family or friends. Participants endorsed strong knowledge of the symptoms occurring in decompensated liver disease, and attributed these symptoms to excessive alcohol consumption. The term 'alcoholic' was commonly used to describe the origins of these symptoms:

*I used to work with a bloke, he was an alcoholic, plain and simple. He was taken into hospital numerous times because of his liver packing up, he was down to 10ml of liquid in a day at one point, that's how ill he was, where he had to pack up drinking totally or die. So he did.*

Participant 16, Type 2 diabetes, Inner City GP, Liver fibrosis

Despite consistent knowledge of alcohol use as a risk factor for CLD, awareness of personal risk of CLD in patients with hazardous alcohol use was variable. Opportunistic intervention by GPs generated awareness of multiple participants' hazardous levels of alcohol use and led to a subsequent liver scan referral. However, several participants described that their alcohol intake was in keeping with their social group, and endorsed feeling surprised when notified that their alcohol consumption level was considered to be hazardous and a risk factor for CLD.

1  
2  
3 Prior to TE, only one participant was aware that obesity could lead to CLD  
4  
5 and none of the participants were aware that type 2 diabetes was a risk factor.  
6  
7 Subsequent to risk stratification, most participants reported an increased awareness  
8  
9 of their personal risk factor for CLD, regardless of TE result. In participants with  
10  
11 hazardous alcohol use this was acknowledgement that their personal alcohol  
12  
13 consumption was hazardous, whilst for participants with type 2 diabetes it was  
14  
15 learning that type 2 diabetes and obesity are risk factors for progressive CLD.  
16  
17  
18  
19

20 *It was not something that ever crossed my mind, that diabetes could give you*  
21 *any serious problems with your liver or kidneys or anything. That was all very*  
22 *new to me, when they asked me to do the study, to go for the scan.*  
23  
24  
25  
26  
27

28 Participant 6, Type 2 Diabetes, Suburban GP, Liver Cirrhosis  
29  
30

## 31 Discussion

### 32 Summary

33  
34  
35 The current study provides a qualitative evaluation of patient experiences with  
36  
37 a primary care liver disease stratification pathway. Specifically, the study provides  
38  
39 insight into patient perceptions of TE screening and diagnosis in the community,  
40  
41 whilst exploring patient risk awareness. The resulting themes suggest that screening  
42  
43 for risk of CLD in the community is acceptable to 'at-risk' patients. Most participants  
44  
45 reported positive experiences of the screening process, highlighting the convenience  
46  
47 of undergoing TE in a primary care setting, the speed of the appointment, and the  
48  
49 painless nature of the TE scan. Participants were willing to undergo a repeat TE  
50  
51 scan in the future. For any screening programme, participant acceptance of the  
52  
53 investigation is crucial, therefore these findings add to the evidence that TE is a  
54  
55 suitable method for risk stratification of CLD in primary care populations. Whilst most  
56  
57  
58  
59  
60

1  
2  
3 participants reported knowledge of excessive alcohol use as a risk factor, there was  
4  
5 very limited awareness of the connection between diabetes and CLD. Importantly,  
6  
7 undergoing TE improved risk awareness in all participants and prompted  
8  
9 contemplation of lifestyle change in most.  
10  
11  
12  
13

### 14 **Comparison with existing literature**

15  
16 The utility of TE as a risk stratification tool has been well documented, with  
17  
18 early work demonstrating the acceptability of liver disease screening in populations  
19  
20 with hepatitis C (10,16,17). The current study builds upon these findings by  
21  
22 demonstrating the acceptability of TE to patients with non-viral risk factors, allowing  
23  
24 effective risk stratification in patients with both hazardous alcohol use and metabolic  
25  
26 conditions.  
27  
28  
29

30  
31 Within the current study, many hazardous alcohol users were unaware that  
32  
33 their alcohol use reached hazardous levels prior to referral for TE. This corroborates  
34  
35 previous qualitative work demonstrating that midlife drinking is heavily governed by  
36  
37 social norms and an association between problem drinking and the inability to fulfil  
38  
39 basic family and work responsibilities(18,19). A lack of patient knowledge may also  
40  
41 result from health care providers' limited understanding about problematic drinking  
42  
43 behaviours. In their qualitative interview study of healthcare professionals who  
44  
45 deliver brief intervention advice for alcohol, Rapley and colleagues demonstrated  
46  
47 that providers were uncertain of what constituted 'at-risk' alcohol intake, resulting in  
48  
49 reduced confidence to provide alcohol consumption advice(20). A lack of risk  
50  
51 awareness did not however seem to preclude uptake of the TE scan in those with  
52  
53 hazardous alcohol use.  
54  
55  
56  
57  
58  
59  
60

1  
2  
3 Strikingly, knowledge that obesity and type 2 diabetes are risk factors for CLD  
4  
5 was uncommon even in patients with these risk factors. Participants with type 2  
6  
7 diabetes frequently reported surprise at receiving an invitation to undergo TE  
8  
9 screening. Wieland and colleagues explored awareness of NAFLD risk in individuals  
10  
11 presenting to an Endocrinology clinic. Of those with significant risk factors (i.e.  
12  
13 overweight/obese and insulin resistant), only 24% were aware of their risk for  
14  
15 developing NAFLD(21). Previous studies have also described a lack of NALFD  
16  
17 specific knowledge amongst primary care providers, leading to the absence of CLD  
18  
19 education during routine diabetes consultations and support courses(22,23). In the  
20  
21 current study, TE screening provided an opportunity to raise awareness of patients'  
22  
23 risk for developing CLD. However, education courses and public health interventions  
24  
25 enhancing knowledge of CLD risk factors in both patients and healthcare  
26  
27 professionals are warranted.  
28  
29  
30  
31  
32  
33  
34

### 35 **Implications for practice**

36  
37 Despite showing the risk stratification pathway to be acceptable to patients,  
38  
39 the results highlighted several areas within the pathway that may require  
40  
41 modification prior to further implementation. Negative feedback about the  
42  
43 stratification pathway related to failed liver stiffness acquisition. In the Community  
44  
45 Liver Study, 97% of patients were successfully stratified using a medium-sized probe  
46  
47 in primary care(9). However, patients with a body mass index (BMI)  $\geq 35$  kg/m<sup>2</sup> were  
48  
49 referred to secondary care to undergo TE with an extra-large (XL) probe. Recent  
50  
51 data suggests that use of an XL sized probe on a portable TE device significantly  
52  
53 increases the number of valid and reliable readings, particularly in patients with a  
54  
55 raised BMI(24). Given the increasing rates of overweight and obesity in primary care  
56  
57  
58  
59  
60

1  
2  
3 settings, a community stratification pathway should have both Medium and XL probe  
4 sizes available for use, particularly in patients with an elevated BMI. This will likely  
5 improve successful liver stiffness acquisition rates, prevent patient disappointment,  
6 and reduce referrals to secondary care.  
7  
8  
9  
10  
11

12 Previous behaviour change studies have also demonstrated that numerical  
13 biomarker feedback increases lifestyle advice uptake by demonstrating physical  
14 damage that patients have caused to themselves(25,26). This suggests that patients  
15 readily comprehended the feedback. Within the current study, the utility of the  
16 numerical liver stiffness value was variable. Some patients struggled to comprehend  
17 the context or scaling of their result whilst others found the specific liver stiffness unit  
18 useful as a baseline or comparison point. Feedback to patients could be improved by  
19 ensuring a clear and structured explanation of how the result relates to the degree of  
20 liver scarring, with the provision of a more comprehensive scale to anchor the  
21 feedback. It also seemed that perception of risk for developing CLD varied as a  
22 result of the way in which these liver stiffness values were explained. Specifically,  
23 whilst significantly abnormal results generated short-term shock and anxiety, less  
24 severe or normal results were perceived as 'nothing to worry about'. Given that all  
25 patients were referred for liver assessment based on a compilation of risk factors,  
26 prospective risk for developing CLD should be clearly conveyed to patients.  
27  
28 Providers may therefore benefit from additional training and guidance in the delivery  
29 of TE results to patients.  
30  
31  
32  
33  
34  
35  
36  
37  
38  
39  
40  
41  
42  
43  
44  
45  
46  
47  
48  
49  
50  
51  
52  
53

## 54 **Strengths and limitations**

55 This study has several strengths. First, participants were invited to interview  
56 six months to two years following their TE appointment, allowing assessment of  
57  
58  
59  
60

1  
2  
3 longer-term perceptions about the process whilst minimizing the likelihood that  
4 details of the pathway were forgotten. Additionally, participants were purposively  
5 sampled from inner city and suburban locations, with different CLD risk factors and  
6 CLD diagnoses. It is believed that use of this sampling technique may allow  
7 transferability to similar primary care settings within the United Kingdom.  
8  
9

10  
11  
12  
13  
14  
15 Several limitations to the study have also to been noted. As with most  
16 qualitative data collection, the interviewer's presence may have impacted participant  
17 response. Importantly, the interviewer (DH) was involved in the larger community  
18 study and had previously met those participants with elevated liver stiffness (n=13).  
19 To minimise response bias, participants were notified that all interview transcripts  
20 would be anonymised. The reliability and validity of data collection and analysis were  
21 also optimised by including an independent researcher (MB) in the development of  
22 the interview guide and through investigator triangulation during transcript coding.  
23 Whilst attempts were made to represent broader community populations, two  
24 sampling limitations are noted. First, non-English speaking patients were excluded  
25 from the interviews. Liver disease prevalence varies widely among different ethnic  
26 groups, particularly in regards to aetiology and risk of hospitalisation and mortality  
27 (13,14). Our findings may therefore not generalise to ethnically diverse populations.  
28 Further, the age range of interviewees was relatively narrow (40-71 years). However,  
29 this reflects the decades where people are most at risk of developing CLD, with the  
30 average age of death from CLD being 59 years in the UK(15).  
31  
32  
33  
34  
35  
36  
37  
38  
39  
40  
41  
42  
43  
44  
45  
46  
47  
48  
49  
50  
51  
52  
53

## 54 **Conclusion**

55  
56  
57 In summary, undergoing TE to screen for CLD in the community was acceptable to  
58 most participants and resulted in greater awareness of liver disease risk, regardless  
59  
60

1  
2  
3 of risk factor. The findings suggest benefits of population-based liver disease  
4  
5 screening in addition to merely earlier diagnoses. Future interventions should target  
6  
7 improved awareness of liver disease risk factors in both patients and providers.  
8  
9  
10  
11  
12  
13  
14

### 15 **Author Contributions**

16  
17 DH, GPA, TC, ING, and MB all contributed to the study design. Data collection was  
18 completed by DH and MB. Data Analysis was completed by HK, DH, JRM, and MB.  
19 HK and DH wrote and revised the current manuscript. Critical revisions to the  
20 manuscript were made by HK, DH, JRM, GPA, TC, ING, and MB. All authors have  
21 approved the final version.  
22  
23

### 24 **Data sharing statement**

25  
26 Redacted data are available upon reasonable request.  
27  
28  
29  
30  
31

### 32 **References**

- 33  
34  
35 1. Williams R, Aspinall R, Bellis M, et al. Addressing liver disease in the UK: a  
36 blueprint for attaining excellence in health care and reducing premature  
37 mortality from lifestyle issues of excess consumption of alcohol, obesity, and  
38 viral hepatitis. *Lancet*. 2014 Nov 29;384(9958):1953–97.  
39  
40 2. Asrani SK, Devarbhavi H, Eaton J, Kamath PS. Burden of liver diseases in the  
41 world. *J Hepatol*. 2019 Jan;70(1):151–71.  
42  
43 3. Williams R, Alexander G, Armstrong I, et al. Disease burden and costs from  
44 excess alcohol consumption, obesity, and viral hepatitis: fourth report of the  
45 Lancet Standing Commission on Liver Disease in the UK. *Lancet*. 2018 Mar  
46 17;391(10125):1097–107.  
47  
48 4. Ratib S, Fleming KM, Crooks CJ, et al. 1 and 5 year survival estimates for  
49 people with cirrhosis of the liver in England, 1998–2009: A large population  
50 study. *J Hepatol*. 2014 Feb;60(2):282–9.  
51  
52 5. Donnan PT, McLernon D, Dillon JF, et al. Development of a decision support  
53 tool for primary care management of patients with abnormal liver function tests  
54 without clinically apparent liver disease: a record-linkage population cohort  
55 study and decision analysis (ALFIE). *Health Technol Assess*. 2009  
56 Apr;13(25):iii–iv, ix–xi, 1–134.  
57  
58  
59  
60



- 1
  - 2
  - 3
  - 4
  - 5
  - 6
  - 7
  - 8
  - 9
  - 10
  - 11
  - 12
  - 13
  - 14
  - 15
  - 16
  - 17
  - 18
  - 19
  - 20
  - 21
  - 22
  - 23
  - 24
  - 25
  - 26
  - 27
  - 28
  - 29
  - 30
  - 31
  - 32
  - 33
  - 34
  - 35
  - 36
  - 37
  - 38
  - 39
  - 40
  - 41
  - 42
  - 43
  - 44
  - 45
  - 46
  - 47
  - 48
  - 49
  - 50
  - 51
  - 52
  - 53
  - 54
  - 55
  - 56
  - 57
  - 58
  - 59
  - 60
6. Koehler EM, Schouten JNL, Hansen BE, et al. Prevalence and risk factors of non-alcoholic fatty liver disease in the elderly: results from the Rotterdam study. *J Hepatol*. 2012 Dec;57(6):1305–11.
  7. Newsome PN, Cramb R, Davison SM, et al. Guidelines on the management of abnormal liver blood tests. *Gut*. 2018 Jan 1;67(1):6–19.
  8. Serra-Burriel M, Graupera I, Toran P, et al. Transient elastography for screening of liver fibrosis: Cost-effectiveness analysis from six prospective cohorts in Europe and Asia. *J Hepatol*. 2019 Dec;71(6):1141–51.
  9. Harman DJ, Ryder SD, James MW, et al. Direct targeting of risk factors significantly increases the detection of liver cirrhosis in primary care: a cross-sectional diagnostic study utilising transient elastography. *BMJ Open*. 2015 May 1;5(4):e007516.
  10. Chalmers J, Wilkes E, Harris R, et al. Development and implementation of a commissioned pathway for the identification and stratification of liver disease in the community. *Frontline Gastroenterol*. 2019 Jun 26;flgastro-2019-101177.
  11. Braun V, Clarke V. Using thematic analysis in psychology. *Qual Res Psychol*. 2006 Jan 1;3(2):77–101.
  12. Pope C, Ziebland S, Mays N. Qualitative research in health care. Analysing qualitative data. *BMJ*. 2000 Jan 8;320(7227):114–6.
  13. Bhala N, Cézard G, Ward HJT, et al. Ethnic Variations in Liver- and Alcohol-Related Disease Hospitalisations and Mortality: The Scottish Health and Ethnicity Linkage Study. *Alcohol Alcohol*. 2016 Sep 1;51(5):593–601.
  14. Setiawan VW, Stram DO, Porcel J, et al. Prevalence of chronic liver disease and cirrhosis by underlying cause in understudied ethnic groups: The multiethnic cohort. *Hepatology*. 2016;64(6):1969–77.
  15. Public Health England. Liver disease: Applying all our health [Internet]. Gov.UK; 2015. Available from: <https://www.gov.uk/government/publications/liver-disease-applying-all-our-health/liver-disease-applying-all-our-health>
  16. Marshall AD, Micallef M, Erratt A, et al. Liver disease knowledge and acceptability of non-invasive liver fibrosis assessment among people who inject drugs in the drug and alcohol setting: The LiveRLife Study. *Int J Drug Policy*. 2015 Oct;26(10):984–91.
  17. Vuppalanchi R, Siddiqui MS, Natta MLV, et al. Performance characteristics of vibration-controlled transient elastography for evaluation of nonalcoholic fatty liver disease. *Hepatology*. 2018;67(1):134–44.
  18. Emslie C, Hunt K, Lyons A. Older and wiser? Men’s and women’s accounts of drinking in early mid-life. *Sociol Health Illn*. 2012;34(4):481–96.

19. Parke H, Michalska M, Russell A, et al. Understanding drinking among midlife men in the United Kingdom: A systematic review of qualitative studies. *Addict Behav Rep.* 2018 Dec 1;8:85–94.
20. Rapley T, May C, Frances Kaner E. Still a difficult business? Negotiating alcohol-related problems in general practice consultations. *Soc Sci Med.* 2006 Nov;63(9):2418–28.
21. Wieland AC, Mettler P, McDermott MT, et al. Low Awareness of Nonalcoholic Fatty Liver Disease Among Patients at High Metabolic Risk. *J Clin Gastroenterol.* 2015 Jan;49(1):e6.
22. Bergqvist C-J, Skoien R, Horsfall L, et al. Awareness and opinions of non-alcoholic fatty liver disease by hospital specialists. *Intern Med J.* 2013 Mar;43(3):247–53.
23. Grattagliano I, D'Ambrosio G, Palmieri VO, et al. Improving nonalcoholic fatty liver disease management by general practitioners: a critical evaluation and impact of an educational training program. *J Gastrointest Liver Dis.* 2008 Dec;17(4):389–94.
24. Harris R, Card TR, Delahooke T, et al. The XL probe: A luxury or a necessity? Risk stratification in an obese community cohort using transient elastography. *United European Gastroenterol J.* 2018 Nov;6(9):1372–9.
25. Bovet P, Perret F, Cornuz J, et al. Improved smoking cessation in smokers given ultrasound photographs of their own atherosclerotic plaques. *Prev Med.* 2002 Feb;34(2):215–20.
26. Parkes G, Greenhalgh T, Griffin M, Dent R. Effect on smoking quit rate of telling patients their lung age: the Step2quit randomised controlled trial. *BMJ.* 2008 Mar 15;336(7644):598–600.

1  
2  
3  
4  
5  
6  
7  
8  
9  
10  
11  
12  
13  
14  
15  
16  
17  
18  
19  
20  
21  
22  
23  
24  
25  
26  
27  
28  
29  
30  
31  
32  
33  
34  
35  
36  
37  
38  
39  
40  
41  
42  
43  
44  
45  
46  
47  
48  
49  
50  
51  
52  
53  
54  
55  
56  
57  
58  
59  
60

For peer review only

## Standards for Reporting Qualitative Research (SRQR)\*

<http://www.equator-network.org/reporting-guidelines/srqr/>

Page/line no(s).

### Title and abstract

|                                                                                                                                                                                                                                                              |                   |
|--------------------------------------------------------------------------------------------------------------------------------------------------------------------------------------------------------------------------------------------------------------|-------------------|
| <p><b>Title</b> - Concise description of the nature and topic of the study Identifying the study as qualitative or indicating the approach (e.g., ethnography, grounded theory) or data collection methods (e.g., interview, focus group) is recommended</p> | <p><b>1</b></p>   |
| <p><b>Abstract</b> - Summary of key elements of the study using the abstract format of the intended publication; typically includes background, purpose, methods, results, and conclusions</p>                                                               | <p><b>3-4</b></p> |

### Introduction

|                                                                                                                                                                     |                 |
|---------------------------------------------------------------------------------------------------------------------------------------------------------------------|-----------------|
| <p><b>Problem formulation</b> - Description and significance of the problem/phenomenon studied; review of relevant theory and empirical work; problem statement</p> | <p><b>5</b></p> |
| <p><b>Purpose or research question</b> - Purpose of the study and specific objectives or questions</p>                                                              | <p><b>6</b></p> |

### Methods

|                                                                                                                                                                                                                                                                                                                                                                                                             |                                                                                                                      |
|-------------------------------------------------------------------------------------------------------------------------------------------------------------------------------------------------------------------------------------------------------------------------------------------------------------------------------------------------------------------------------------------------------------|----------------------------------------------------------------------------------------------------------------------|
| <p><b>Qualitative approach and research paradigm</b> - Qualitative approach (e.g., ethnography, grounded theory, case study, phenomenology, narrative research) and guiding theory if appropriate; identifying the research paradigm (e.g., postpositivist, constructivist/ interpretivist) is also recommended; rationale**</p>                                                                            | <p><b>6 &amp; 8 (design section &amp; data analysis section)</b></p>                                                 |
| <p><b>Researcher characteristics and reflexivity</b> - Researchers' characteristics that may influence the research, including personal attributes, qualifications/experience, relationship with participants, assumptions, and/or presuppositions; potential or actual interaction between researchers' characteristics and the research questions, approach, methods, results, and/or transferability</p> | <p><b>7, 8 &amp; 20 (data collection section, data analysis section &amp; strengths and limitations section)</b></p> |
| <p><b>Context</b> - Setting/site and salient contextual factors; rationale**</p>                                                                                                                                                                                                                                                                                                                            | <p><b>6 to 8</b></p>                                                                                                 |
| <p><b>Sampling strategy</b> - How and why research participants, documents, or events were selected; criteria for deciding when no further sampling was necessary (e.g., sampling saturation); rationale**</p>                                                                                                                                                                                              | <p><b>6 to 8</b></p>                                                                                                 |
| <p><b>Ethical issues pertaining to human subjects</b> - Documentation of approval by an appropriate ethics review board and participant consent, or explanation for lack thereof; other confidentiality and data security issues</p>                                                                                                                                                                        | <p><b>7 &amp; 8 (design section and data collection section)</b></p>                                                 |
| <p><b>Data collection methods</b> - Types of data collected; details of data collection procedures including (as appropriate) start and stop dates of data collection and analysis, iterative process, triangulation of sources/methods, and modification of procedures in response to evolving study findings; rationale**</p>                                                                             | <p><b>7 &amp; 8 (design section and data collection section)</b></p>                                                 |

|                       |                                                                                                                                                                                                                                                       |                                                                    |
|-----------------------|-------------------------------------------------------------------------------------------------------------------------------------------------------------------------------------------------------------------------------------------------------|--------------------------------------------------------------------|
| 1<br>2<br>3<br>4<br>5 | <b>Data collection instruments and technologies</b> - Description of instruments (e.g., interview guides, questionnaires) and devices (e.g., audio recorders) used for data collection; if/how the instrument(s) changed over the course of the study | <b>7 &amp; 8 (data collection and interview procedure section)</b> |
| 6<br>7<br>8<br>9      | <b>Units of study</b> - Number and relevant characteristics of participants, documents, or events included in the study; level of participation (could be reported in results)                                                                        | <b>9 (participants section) and Table 1</b>                        |
| 10<br>11<br>12<br>13  | <b>Data processing</b> - Methods for processing data prior to and during analysis, including transcription, data entry, data management and security, verification of data integrity, data coding, and anonymization/de-identification of excerpts    | <b>8 (data collection and data analysis section)</b>               |
| 14<br>15<br>16<br>17  | <b>Data analysis</b> - Process by which inferences, themes, etc., were identified and developed, including the researchers involved in data analysis; usually references a specific paradigm or approach; rationale**                                 | <b>8 (data analysis section)</b>                                   |
| 18<br>19<br>20<br>21  | <b>Techniques to enhance trustworthiness</b> - Techniques to enhance trustworthiness and credibility of data analysis (e.g., member checking, audit trail, triangulation); rationale**                                                                | <b>8 (analysis section)</b>                                        |

### Results/findings

|                      |                                                                                                                                                                                                   |             |
|----------------------|---------------------------------------------------------------------------------------------------------------------------------------------------------------------------------------------------|-------------|
| 24<br>25<br>26<br>27 | <b>Synthesis and interpretation</b> - Main findings (e.g., interpretations, inferences, and themes); might include development of a theory or model, or integration with prior research or theory | <b>9-16</b> |
| 28<br>29<br>30       | <b>Links to empirical data</b> - Evidence (e.g., quotes, field notes, text excerpts, photographs) to substantiate analytic findings                                                               | <b>9-16</b> |

### Discussion

|                                        |                                                                                                                                                                                                                                                                                                                                                                                                             |                                                        |
|----------------------------------------|-------------------------------------------------------------------------------------------------------------------------------------------------------------------------------------------------------------------------------------------------------------------------------------------------------------------------------------------------------------------------------------------------------------|--------------------------------------------------------|
| 33<br>34<br>35<br>36<br>37<br>38<br>39 | <b>Integration with prior work, implications, transferability, and contribution(s) to the field</b> - Short summary of main findings; explanation of how findings and conclusions connect to, support, elaborate on, or challenge conclusions of earlier scholarship; discussion of scope of application/generalizability; identification of unique contribution(s) to scholarship in a discipline or field | <b>16-20</b>                                           |
| 40<br>41<br>42<br>43                   | <b>Limitations</b> - Trustworthiness and limitations of findings                                                                                                                                                                                                                                                                                                                                            | <b>20 &amp; 21 (strengths and limitations section)</b> |

### Other

|                |                                                                                                                                               |          |
|----------------|-----------------------------------------------------------------------------------------------------------------------------------------------|----------|
| 46<br>47<br>48 | <b>Conflicts of interest</b> - Potential sources of influence or perceived influence on study conduct and conclusions; how these were managed | <b>2</b> |
| 49<br>50<br>51 | <b>Funding</b> - Sources of funding and other support; role of funders in data collection, interpretation, and reporting                      | <b>2</b> |

1 \*The authors created the SRQR by searching the literature to identify guidelines, reporting  
2 standards, and critical appraisal criteria for qualitative research; reviewing the reference  
3 lists of retrieved sources; and contacting experts to gain feedback. The SRQR aims to  
4 improve the transparency of all aspects of qualitative research by providing clear standards  
5 for reporting qualitative research.  
6  
7

8 \*\*The rationale should briefly discuss the justification for choosing that theory, approach,  
9 method, or technique rather than other options available, the assumptions and limitations  
10 implicit in those choices, and how those choices influence study conclusions and  
11 transferability. As appropriate, the rationale for several items might be discussed together.  
12

13  
14 **Reference:**

15 O'Brien BC, Harris IB, Beckman TJ, Reed DA, Cook DA. **Standards for reporting qualitative**  
16 **research: a synthesis of recommendations.** *Academic Medicine*, Vol. 89, No. 9 / Sept 2014  
17 DOI: 10.1097/ACM.0000000000000388  
18  
19  
20  
21  
22  
23  
24  
25  
26  
27  
28  
29  
30  
31  
32  
33  
34  
35  
36  
37  
38  
39  
40  
41  
42  
43  
44  
45  
46  
47  
48  
49  
50  
51  
52  
53  
54  
55  
56  
57  
58  
59  
60

# BMJ Open

## Acceptability of chronic liver disease screening in a UK primary care setting: A qualitative evaluation

|                                 |                                                                                                                                                                                                                                                                                                                                                                                                                                                                                                                                                                                                                                                                                                                                                                                                                                                                                                                                                          |
|---------------------------------|----------------------------------------------------------------------------------------------------------------------------------------------------------------------------------------------------------------------------------------------------------------------------------------------------------------------------------------------------------------------------------------------------------------------------------------------------------------------------------------------------------------------------------------------------------------------------------------------------------------------------------------------------------------------------------------------------------------------------------------------------------------------------------------------------------------------------------------------------------------------------------------------------------------------------------------------------------|
| Journal:                        | <i>BMJ Open</i>                                                                                                                                                                                                                                                                                                                                                                                                                                                                                                                                                                                                                                                                                                                                                                                                                                                                                                                                          |
| Manuscript ID                   | bmjopen-2020-041574.R1                                                                                                                                                                                                                                                                                                                                                                                                                                                                                                                                                                                                                                                                                                                                                                                                                                                                                                                                   |
| Article Type:                   | Original research                                                                                                                                                                                                                                                                                                                                                                                                                                                                                                                                                                                                                                                                                                                                                                                                                                                                                                                                        |
| Date Submitted by the Author:   | 27-Aug-2020                                                                                                                                                                                                                                                                                                                                                                                                                                                                                                                                                                                                                                                                                                                                                                                                                                                                                                                                              |
| Complete List of Authors:       | <p>Knight, Holly; University of Nottingham, Division of Epidemiology and Public Health</p> <p>Harman, David; Nottingham Digestive Diseases Centre, University of Nottingham</p> <p>Morling, Joanne; University of Nottingham, Division of Epidemiology and Public Health; NIHR Nottingham Biomedical Research Centre, Nottingham University Hospitals</p> <p>Aithal, Guruprasad; Nottingham Digestive Diseases Centre, University of Nottingham; NIHR Nottingham Biomedical Research Centre, Nottingham University Hospitals</p> <p>Card, Timothy; University of Nottingham, Division of Epidemiology and Public Health; Nottingham Digestive Diseases Centre, University of Nottingham</p> <p>Guha, Indra; Nottingham Digestive Diseases Centre, University of Nottingham; NIHR Nottingham Biomedical Research Centre, Nottingham University Hospitals</p> <p>Bains, Manpreet; University of Nottingham, Division of Epidemiology and Public Health</p> |
| <b>Primary Subject Heading</b>: | Public health                                                                                                                                                                                                                                                                                                                                                                                                                                                                                                                                                                                                                                                                                                                                                                                                                                                                                                                                            |
| Secondary Subject Heading:      | Gastroenterology and hepatology, Qualitative research                                                                                                                                                                                                                                                                                                                                                                                                                                                                                                                                                                                                                                                                                                                                                                                                                                                                                                    |
| Keywords:                       | PUBLIC HEALTH, QUALITATIVE RESEARCH, PRIMARY CARE                                                                                                                                                                                                                                                                                                                                                                                                                                                                                                                                                                                                                                                                                                                                                                                                                                                                                                        |
|                                 |                                                                                                                                                                                                                                                                                                                                                                                                                                                                                                                                                                                                                                                                                                                                                                                                                                                                                                                                                          |

SCHOLARONE™  
Manuscripts



I, the Submitting Author has the right to grant and does grant on behalf of all authors of the Work (as defined in the below author licence), an exclusive licence and/or a non-exclusive licence for contributions from authors who are: i) UK Crown employees; ii) where BMJ has agreed a CC-BY licence shall apply, and/or iii) in accordance with the terms applicable for US Federal Government officers or employees acting as part of their official duties; on a worldwide, perpetual, irrevocable, royalty-free basis to BMJ Publishing Group Ltd ("BMJ") its licensees and where the relevant Journal is co-owned by BMJ to the co-owners of the Journal, to publish the Work in this journal and any other BMJ products and to exploit all rights, as set out in our [licence](#).

The Submitting Author accepts and understands that any supply made under these terms is made by BMJ to the Submitting Author unless you are acting as an employee on behalf of your employer or a postgraduate student of an affiliated institution which is paying any applicable article publishing charge ("APC") for Open Access articles. Where the Submitting Author wishes to make the Work available on an Open Access basis (and intends to pay the relevant APC), the terms of reuse of such Open Access shall be governed by a Creative Commons licence – details of these licences and which [Creative Commons](#) licence will apply to this Work are set out in our licence referred to above.

Other than as permitted in any relevant BMJ Author's Self Archiving Policies, I confirm this Work has not been accepted for publication elsewhere, is not being considered for publication elsewhere and does not duplicate material already published. I confirm all authors consent to publication of this Work and authorise the granting of this licence.



## ACCEPTABILITY OF CHRONIC LIVER DISEASE SCREENING IN A UK PRIMARY CARE SETTING: A QUALITATIVE EVALUATION

### Authors

Holly Knight<sup>1</sup>, David Harman<sup>2</sup>, Joanne R Morling<sup>1,3</sup>, Guruprasad Aithal<sup>2,3</sup>, Timothy Card<sup>1,2</sup>, Indra Neil Guha<sup>2,3</sup>, Manpreet Bains<sup>1</sup>

Holly Knight BA, MA, PhD<sup>1</sup>

David Harman BMedSci, BMBS, MRCP, PhD<sup>2</sup>

Joanne R Morling FRCP, FFPH, PhD<sup>1,3</sup>

Professor Guruprasad Aithal BSc, MBBS, MD, DNB, FRCP, PhD<sup>2,3</sup>

Timothy Card FRCP, PhD<sup>1,2</sup>

Indra Neil Guha FRCP, PhD<sup>2,3</sup>

Manpreet Bains BSc, MSc, PhD<sup>1</sup>

### Affiliations

1. Division of Epidemiology and Public Health, School of Medicine, University of Nottingham, Clinical Sciences Building 2, City Hospital, Nottingham, UK, NG5 1PB
2. Nottingham Digestive Diseases Centre (NDDC), School of Medicine, University of Nottingham, Nottingham, UK, NG7 2UH
3. NIHR Nottingham Biomedical Research Centre (BRC), Nottingham University Hospitals NHS Trust and the University of Nottingham, Nottingham, UK, NG7 2UH

### Corresponding author:

Dr Holly Knight

Division of Epidemiology and Public Health, University of Nottingham  
Clinical Sciences Building, City Hospital Campus, Hucknall Road, Nottingham, NG5 1PB

Email: [holly.knight@nottingham.ac.uk](mailto:holly.knight@nottingham.ac.uk)

Tel: 0115 823 1661

## Funding

GPA and ING are supported by the Gastrointestinal and Liver Disorder theme of the NIHR Nottingham Biomedical Research Centre (Reference no: BRC-1215-20003). DH received support from the Gastrointestinal and Liver Disorder theme of the NIHR Nottingham Biomedical Research Centre (Reference no: BRC-1215-20003) for the duration of this study. JRM and HK receive salary support from a Medical Research Council Clinician Scientist Fellowship [grant number MR/P008348/1]. Funding for the Nottingham liver disease stratification pathway has also been received from the East Midlands Academic Health Sciences Network.

**Ethical approval** was received from the East Midlands – Leicester Research Ethics Committee (13/EM/0123).

**Competing interests:** None

## ACCEPTABILITY OF CHRONIC LIVER DISEASE SCREENING IN A UK PRIMARY CARE SETTING: A QUALITATIVE EVALUATION

### Abstract

#### Objectives

The increasing incidence of chronic liver disease (CLD) in the UK may be attributed to a rise in preventable risk factors, including hazardous alcohol use and type 2 diabetes. Transient elastography (TE) can rapidly stratify risk of CLD in primary care populations and provide an opportunity to raise patient awareness of risk factors. This study explores patient experiences of TE screening in a primary care setting. Additionally, patient awareness of CLD risk is explored.

#### Study design and setting

A qualitative process evaluation of a community-screening pathway for CLD (Nottingham, UK). Participants completed semi-structured interviews, which were audio-recorded, transcribed verbatim, and analysed thematically.

#### Participants

Twenty adults were purposively recruited six months to two years post-TE screening. Inclusion criteria included (1) hazardous alcohol use, (2) type 2 diabetes and/or (3) persistently elevated liver enzymes without known cause.

#### Results

Undergoing TE in primary care was seen as acceptable to most participants. Hazardous alcohol use was identified as the primary cause of CLD; no participants were aware of metabolic risk factors. TE improved understanding of personal risk factors and prompted contemplation of lifestyle change across all TE stratifications.

1  
2  
3 However, participants' perceptions of risk were altered by the healthcare providers'  
4 communication of TE scores.  
5  
6  
7

## 8 **Conclusions**

9  
10 High acceptability of TE, regardless of risk factor, provides strong support for  
11 inclusion of TE stratification in primary care. Findings highlight the positive impact of  
12 receiving TE on risk awareness. Future clinical iterations should improve the  
13 structure and communication of TE results to patients.  
14  
15  
16  
17  
18  
19  
20  
21  
22

## 23 **Strengths and limitations of this study**

- 24  
25  
26 • This study presents the first qualitative evaluation of patient experiences  
27 undergoing transient elastography screening in primary care for non-viral liver  
28 disease.  
29  
30  
31
- 32  
33 • Purposive sampling allowed for representation of varied GP locations and  
34 chronic liver disease risk factors/diagnoses.  
35  
36
- 37  
38 • Limited ethnic diversity in the sample potentially limits generalisability to non  
39 white-British populations.  
40  
41
- 42  
43 • The interviewer was involved in a larger community study of the screening  
44 pathway which may have inadvertently impacted the findings.  
45  
46  
47  
48  
49  
50  
51  
52  
53  
54  
55  
56  
57  
58  
59  
60

## Introduction

Chronic liver disease (CLD) is the third most common cause of premature death in the UK, with mortality rates increasing by 400% since 1970(1). The rising incidence of CLD and associated increase in mortality is driven by a rise in risk factors, such as hazardous alcohol use and type 2 diabetes, and is therefore considered preventable(2,3). However, the largely asymptomatic nature of CLD means initial detection of the disease predominantly occurs following hospitalisation with decompensation, resulting in significantly impaired prognosis(4).

Traditional approaches to the identification of CLD in primary care settings demonstrate poor sensitivity(5). In a community population, abnormal liver enzymes were observed in approximately one fifth of patients tested over a five-year period (5). Despite this, detection of significant liver disease was remarkably low, occurring in only 1.14% of the sample(5). Conversely, normal liver enzyme results do not accurately exclude underlying CLD; approximately 88% of patients with non-alcoholic fatty liver disease (NAFLD) over the age of 65 years present with normal liver enzymes(6). To improve the accuracy of early liver disease detection, recent guidelines recommend the use of additional risk stratification tools, particularly in patients with a known history of harmful alcohol use or NAFLD(7).

Novel risk stratification approaches, such as transient elastography (TE), enable rapid identification of CLD in those who may be unaware of their illness(8). TE provides an immediate numerical value for liver stiffness, allowing feedback to patients regarding their risk of liver disease within the same appointment. Furthermore, the non-invasive nature of TE allows for rapid risk stratification that is readily deliverable in community settings(9). The Nottingham Community Liver Study was a large feasibility study that embedded portable TE devices (Fibroscan,

1  
2  
3 EchoSens, Paris, France) into two general practitioner (GP) practices in the  
4  
5 Rushcliffe borough of Nottingham, UK. The primary objective was to assess whether  
6  
7 inclusion of TE as a risk stratification tool could improve early identification of CLD.  
8  
9  
10 The combined patient population of both practices was 12,368, of whom 10% had  
11  
12 type 2 diabetes or harmful alcohol use as risk factors for CLD. TE screening of  
13  
14 patients with these risk factors led to a 140% increase in diagnoses of cirrhosis,  
15  
16 despite 90.9% of the cirrhotic patients having normal liver enzymes(9).  
17  
18

19  
20 Integration of TE into primary care settings has allowed for successful  
21  
22 identification of previously undetected CLD. However, prior to further  
23  
24 implementation, it is important to assess the acceptability of this intervention to  
25  
26 patients, including any barriers or enablers to uptake. This study presents a  
27  
28 qualitative process evaluation of the Nottingham Community Liver Study, exploring  
29  
30 the impact of undergoing TE in a primary care setting. We sought to understand  
31  
32 patient experiences of the delivery and process of TE screening for CLD, and the  
33  
34 broader impact of TE screening on patient risk awareness.  
35  
36  
37

## 38 **Methods**

### 39 **Study design and setting**

40  
41  
42 This was a qualitative process evaluation that used semi-structured interviews  
43  
44 to explore participants' experiences of CLD screening in primary care. Participants  
45  
46 were purposively sampled from a large cohort of patients who underwent  
47  
48 stratification of CLD in the community using a portable TE device (Fibroscan;  
49  
50 EchoSens, Paris), as part of the Nottingham Community Liver Study (Nottingham;  
51  
52 UK). A detailed description of this study and the recruitment processes has been  
53  
54 published previously(9). Briefly, patients with defined risk factors for development of  
55  
56 CLD were identified through electronic medical records and invited by their GPs to  
57  
58  
59  
60

1  
2  
3 attend a liver assessment at their GP practice. Risk factors included any of 1)  
4 hazardous alcohol intake (defined as i) >14 units per week for women, > 21 units per  
5 week for men, ii) and/or presence of alcohol misuse READ code, iii) and/or AUDIT  
6 score > 8), or 2) type 2 diabetes, or 3) persistently raised liver enzymes without  
7 known cause. Patients were excluded if they showed evidence of hepatic fibrosis,  
8 cirrhosis, or metastatic malignancy from previous investigation, contraindications  
9 existed for performing TE (e.g. pregnancy, pacemakers), or severe cognitive  
10 impairment prevented consent(9,10). Prior to undergoing TE, patients were provided  
11 with information about the TE procedure. Following TE, all patients received lifestyle  
12 advice from the nursing staff and a British Liver Trust 'Looking After Your Liver'  
13 leaflet, regardless of TE result or risk factor.

14  
15 To adequately represent those undergoing TE, the sampling strata for  
16 invitation for interview were i) GP surgery location (suburban versus inner city), ii)  
17 CLD risk factor (hazardous alcohol use or type 2 diabetes), and iii) diagnosis  
18 assigned after community liver disease stratification (normal liver stiffness vs. liver  
19 fibrosis vs. liver cirrhosis). Patients were excluded from interview selection if they  
20 were unable to communicate in English. Written consent was obtained following  
21 discussion with a trained research nurse. Ethical approval was received from the  
22 East Midlands – Leicester Research Ethics Committee (13/EM/0123).

### 23 24 25 26 27 28 29 30 31 32 33 34 35 36 37 38 39 40 41 42 43 44 45 46 47 48 49 50 **Data collection and interview procedure**

51  
52 Interview questions were predominantly open-ended, with probes used where  
53 necessary to expand upon participant responses. Both positive and negative views  
54 of the intervention were explored. The interview guide (appendix 1) was reviewed by  
55 an independent qualitative researcher (MB). The guide was piloted with a trained  
56  
57  
58  
59  
60

1  
2  
3 research nurse and the initial three participants for testing and refinement. Only  
4  
5 minor amendments were made following the pilot, meaning the initial three  
6  
7 participants were included in the analysis.  
8  
9

10 Face-to-face interviews were conducted over a six month period (by DH) with  
11  
12 patients who had attended a TE assessment six months to two years prior to data  
13  
14 collection. Interviews took place either in the participant's home (n=14) or an  
15  
16 interview room at a tertiary care centre (n=6) (participant choice). Participants were  
17  
18 notified that their interview responses would be anonymised. Interviews continued  
19  
20 until data saturation was reached. Interviews were digitally audio-recorded and  
21  
22 transcribed verbatim by a specialist transcription company.  
23  
24  
25

## 26 27 **Data analysis**

28  
29 Data was analysed thematically using an inductive approach(11). During the  
30  
31 first phase of analysis, DH conducted a preliminary scan of the data, allowing  
32  
33 generation of initial codes for data extracts. The analysis was then re-focussed to  
34  
35 sort and group the codes into analytical categories or 'themes'. A 'constant  
36  
37 comparative' method was used to compare individual data items with the rest of the  
38  
39 data, ensuring that the preliminary themes retained importance with additional  
40  
41 interviews(12). To ensure reliability of the coding system, MB independently coded  
42  
43 and compared five interview transcripts.  
44  
45  
46

47  
48 During the second phase, themes were refined to ensure data cohered  
49  
50 together meaningfully, whilst themes were clear and distinct. Themes were  
51  
52 reorganised and collapsed as required. Finally, a detailed analysis was conducted  
53  
54 for each theme and data excerpts were identified to illustrate the final themes. All  
55  
56 coding was checked by an independent researcher (MB) to ensure validity. NVivo 11  
57  
58  
59  
60



(QSR International Ltd, Melbourne, Australia) was used as a data management tool throughout the analysis process.

## Patient and public involvement

Patients and members of the public were not involved in the study design, interpretation of results, or writing of the manuscript.

## Results

### Participants

In total 28 participants were invited for interview. Eight declined participation, of whom seven declined due to time limitations and one could not remember undergoing TE. The remaining 20 participants completed the interview (mean length of interview was 27.6 minutes; standard deviation 7.6; range 16-46 minutes). Mean participant age was 57.9 years (standard deviation = 9.3; range 40-71 years), and 12 participants (60%) were male. Participants were adequately distributed across the sampling strata (see Table 1).

Table 1. Demographic and clinical characteristics of interviewed patients (n=20)

| Characteristic         | n (%)      |
|------------------------|------------|
| <i>Gender</i>          |            |
| Male                   | n=12 (60%) |
| Female                 | n= 8 (40%) |
| <i>GP location</i>     |            |
| Inner city             | n=12 (60%) |
| Suburban               | n=8 (40%)  |
| <i>CLD Risk factor</i> |            |
| Alcohol                | n=8 (40%)  |
| Type 2 diabetes        | n=12 (60%) |

|                      |           |
|----------------------|-----------|
| <i>TE result*</i>    |           |
| Abnormal – Cirrhosis | n=6 (30%) |
| Abnormal – Fibrosis  | n=7 (35%) |
| Normal               | n=7 (35%) |

\*TE result refers to diagnosis assigned on the basis of Transient Elastography (Fibroscan) reading of liver stiffness, and subsequent confirmatory tests for abnormal scan to determine whether cirrhosis was present. Normal TE result < 8 kPa; Abnormal – Fibrosis result = 8 – 15 kPa; Abnormal – Cirrhosis result > 15 kPa

## Thematic analysis

Analysis of the interviews revealed three main themes and two corresponding sub-themes. Subthemes detail general acceptability, comprehension, and impact of receiving TE results. Participant awareness of their risk for CLD prior to and following TE was also explored. The presenting risk factor and TE stratification are provided for each quoted participant.

### **1. Liver disease risk awareness**

Participants discussed the impact that the risk stratification pathway had on their own risk awareness. Prior to undergoing TE in primary care, participant knowledge of CLD risk factors was relatively limited. Hazardous alcohol use was recognised to be an important cause of CLD by all bar one of the participants. This knowledge was acquired from a number of sources, including media reports on the risks of alcohol and personal experiences of hepatic cirrhosis in close family or friends. Participants endorsed strong knowledge of the symptoms occurring in decompensated liver disease, and attributed these symptoms to excessive alcohol consumption. The term 'alcoholic' was commonly used to describe the origins of these symptoms:

1  
2  
3 *I used to work with a bloke, he was an alcoholic, plain and simple. He was taken*  
4 *into hospital numerous times because of his liver packing up, he was down to*  
5 *10ml of liquid in a day at one point, that's how ill he was, where he had to pack up*  
6 *drinking totally or die.*  
7  
8  
9  
10  
11  
12

13 Participant 16, Type 2 diabetes, Liver fibrosis  
14  
15

16  
17 Despite consistent knowledge of alcohol use as a risk factor for CLD,  
18 awareness of personal risk of CLD in patients with hazardous alcohol use was  
19 variable. Opportunistic intervention by GPs generated awareness of multiple  
20 participants' hazardous levels of alcohol use and led to a subsequent liver scan  
21 referral. However, several participants described that their alcohol intake was in  
22 keeping with their social group, and endorsed feeling surprised when notified that  
23 their alcohol consumption level was considered to be hazardous and a risk factor for  
24 CLD.  
25  
26  
27  
28  
29  
30  
31  
32  
33  
34  
35

36 Prior to TE, only one participant was aware that obesity could lead to CLD  
37 and none of the participants were aware that type 2 diabetes was a risk factor.  
38 Subsequent to risk stratification, most participants reported an increased awareness  
39 of their personal risk factor for CLD, regardless of TE result. In participants with  
40 hazardous alcohol use this was acknowledgement that their personal alcohol  
41 consumption was hazardous, whilst for participants with type 2 diabetes it was  
42 learning that type 2 diabetes and obesity are risk factors for progressive CLD.  
43  
44  
45  
46  
47  
48  
49  
50  
51  
52

53 *It was not something that ever crossed my mind, that diabetes could give you*  
54 *any serious problems with your liver or kidneys or anything. That was all very*  
55 *new to me, when they asked me to do the study, to go for the scan.*  
56  
57  
58  
59  
60

Participant 6, Type 2 Diabetes, Liver Cirrhosis

## **2. Experience of stratification pathway**

### **Acceptability and understanding of TE screening**

Motivation to attend the TE appointment was driven by both medical and emotional factors. Participants with hazardous alcohol use were not routinely part of a medical programme (i.e. diabetes management) prior to the current study. Therefore, the invitation to undergo TE was unexpected and generated both surprise and anxiety in some individuals. However, in interviewed participants, this did not appear to preclude attendance for the TE appointment. Several participants discussed being accustomed to screening procedures as part of their routine diabetes care, and were happy to attend on the recommendation of the GP team alone. Other participants endorsed a desire to attend the TE scan to enable the early detection of a liver problem before it resulted in any significant symptoms.

*I was okay because I wanted things finding out, if there was anything, you know, wrong with me*

Participant 2, Type 2 Diabetes, Liver Cirrhosis

The majority of participants recalled a basic understanding of the TE device derived from either a leaflet provided prior to the appointment or the explanation provided by the nurses during the appointment. Several participants accurately described the use of TE to explore scarring in the liver and used terminology such as 'rigidity', 'hardness' or 'stiffness'.

1  
2  
3 *The two nurses, they were very good and they explained how it worked and*  
4 *what happens to the test, so they explained it well, what it was measuring; it*  
5 *was the density of the liver, like an ultrasound, so they explained all that and*  
6 *they were very good.*  
7  
8  
9  
10  
11  
12

13 Participant 20, Hazardous Alcohol Use, Normal liver scan  
14  
15

16 The process of being screened for CLD in a primary care setting was  
17 regarded as a positive experience by most. Many participants reported that being  
18 reviewed at their GP practice, rather than in a hospital setting, was convenient and  
19 allowed attendance outside of working hours. One participant also felt that  
20 attendance rates for liver scans in the community would be improved due to this  
21 convenience. For most participants, the rapidity of the screening was seen as  
22 surprising, whilst the TE scan itself was described as painless.  
23  
24  
25  
26  
27  
28  
29  
30  
31  
32

33 *It was all done in 20 minutes over and done with and it was not a problem at*  
34 *all, it was probably the easiest scan I've ever had, for anything! When they*  
35 *say "it's done", you think "already?". "It takes a bit longer than this to have an*  
36 *appointment with the GP".*  
37  
38  
39  
40  
41  
42  
43

44 Participant 16, Type 2 Diabetes, Liver Fibrosis  
45  
46

47 One participant described the scan as an uncomfortable procedure, although  
48 later described the process of having a liver biopsy as comparatively more painful.  
49 Negative feedback was also expressed by one participant for whom it was not  
50 possible to obtain a valid liver assessment in the community. Although the participant  
51 felt that the concept of community liver scanning was a good idea, he did not feel  
52 that the process itself was well executed. This participant was subsequently referred  
53  
54  
55  
56  
57  
58  
59  
60

1  
2  
3 to secondary care for TE screening.  
4  
5

### 6 **Comprehension of results**

7  
8 Participant recall of their numerical liver stiffness value was inconsistent.  
9  
10 Several participants did not remember receiving a numeric result, whilst  
11  
12 approximately half of participants interviewed were still able to recall their exact liver  
13  
14 stiffness measurement. Participant preference for the format of their liver stiffness  
15  
16 result was also varied. Some participants felt that simple categorisation of their scan  
17  
18 result as normal or abnormal was informative enough. Other participants preferred a  
19  
20 numerical value as the result felt more personalised and provided a baseline for  
21  
22 comparison in case further scans were required.  
23  
24  
25  
26  
27  
28  
29

30  
31 *The terms “satisfactory”, “normal”, “good”, “very good”, “excellent”, they’re all*  
32  
33 *subjective, they mean different things to different people but a score is a*  
34  
35 *score, if you have a score of 6.1, it’s not 6.2 and neither is it 5.9, it’s a definite*  
36  
37 *starting point.*  
38  
39

40  
41 Participant 5, Type 2 Diabetes, Normal liver scan  
42  
43

44 Several participants felt able to use the numerical liver stiffness result to  
45  
46 assess the severity of their liver disease. However, multiple participants described  
47  
48 feeling uncertain about how to interpret the severity of abnormal results as the  
49  
50 possible ranges and severities of liver stiffness results did not appear to be  
51  
52 consistently discussed during the screening.  
53  
54  
55

### 56 **3. Impact of screening result**

1  
2  
3 Most participants reported the expectation that liver abnormality would not be  
4 detected. This was derived from a number of factors, including a prior lack of  
5 knowledge regarding their own risk factor for developing CLD, the absence of  
6 knowledge regarding their own risk factor for developing CLD, the absence of  
7 previous symptoms, and in several participants previously normal liver function blood  
8 tests. Following delivery of the scan results, participants with normal liver stiffness  
9 described a sense of relief that a significant problem or additional comorbidity was  
10 not detected. Conversely, participants with elevated liver stiffness results commonly  
11 reported feeling surprised, shocked, or anxious. For those diagnosed with cirrhosis,  
12 most expressed concern that their disease would progress quickly or result in their  
13 premature death. However, several participants expressed relief following diagnosis  
14 with cirrhosis rather than an underlying malignancy.  
15  
16  
17  
18  
19  
20  
21  
22  
23  
24  
25  
26  
27  
28  
29  
30

31 *Everybody thinks there might be cancer there sometimes and it was just "oh*  
32 *it's not a cancer, it's that ... in another five years or so!*  
33  
34  
35

36 Participant 19, Type 2 Diabetes, Liver Cirrhosis  
37  
38  
39  
40  
41

42 Provider delivery of the scan result appeared to contribute to the impact of the  
43 result. Specifically, several participants with fibrosis felt that the abnormality of their  
44 TE results did not represent a significant health issue because of the message  
45 conveyed by the health care provider conducting the scan. This resulted from the  
46 perception that mild elevations did not warrant concern:  
47  
48  
49  
50  
51  
52  
53

54 *They told me that mine was above but not serious. That's what they said it*  
55 *was. Nothing to worry about, it was above normal but "don't worry about it".*  
56  
57  
58  
59

60 Participant 9, Type 2 Diabetes, Liver Fibrosis

1  
2  
3 The CLD screening process provided multiple opportunities to raise  
4 participant awareness of their liver health and fostered contemplation of potential  
5 lifestyle changes. Both hazardous alcohol users and participants with type 2 diabetes  
6 receiving normal liver stiffness results reported immediate contemplation of lifestyle  
7 changes. Participants with elevated liver stiffness discussed the abnormal result, and  
8 subsequent advice from the nursing team and liver specialist, as the initiator of  
9 contemplation of lifestyle change. Several participants discussed that being told they  
10 had an abnormal liver scan was a 'wake-up call' and subsequently prompted them to  
11 consider changes that could be made to their lifestyle.  
12  
13  
14  
15  
16  
17  
18  
19  
20  
21  
22  
23  
24

25  
26 ***What exactly was the trigger that got you thinking that you needed to do***  
27 ***something?***  
28

29  
30 *Having an abnormal test, no doubt about that. I think we all like to think we're*  
31 *perfect ...! If there's something wrong and you can do something about it,*  
32 *you're daft if you don't, that's the way I look at it.*  
33  
34  
35

36 Participant 9, Type 2 Diabetes, Liver Fibrosis  
37  
38  
39  
40

41 As a marker of acceptability, all participants were willing to undergo further CLD  
42 screening in primary care, with most reporting that an interval of three to five years  
43 for repeated TE scans would be reasonable. Participants with normal liver stiffness  
44 felt it would be important to repeat the liver scan to ensure that no new abnormality  
45 had developed. For participants with abnormal liver stiffness, the most important  
46 reasons for repeating the TE scan were to monitor for worsening of their CLD and to  
47 detect if improvements in lifestyle had resulted in subsequent improvements in liver  
48 stiffness.  
49  
50  
51  
52  
53  
54  
55  
56  
57  
58  
59  
60



## Discussion

### Summary

The current study provides a qualitative evaluation of patient experiences with a primary care liver disease stratification pathway. Specifically, the study provides insight into patient perceptions of TE screening and diagnosis in the community, whilst exploring patient risk awareness. The resulting themes suggest that screening for risk of CLD in the community is acceptable to 'at-risk' patients. Most participants reported positive experiences of the screening process, highlighting the convenience of undergoing TE in a primary care setting, the speed of the appointment, and the painless nature of the TE scan. Participants were willing to undergo a repeat TE scan in the future. For any screening programme, participant acceptance of the investigation is crucial, therefore these findings add to the evidence that TE is a suitable method for risk stratification of CLD in primary care populations. Whilst most participants reported knowledge of excessive alcohol use as a risk factor, there was very limited awareness of the connection between diabetes and CLD. Importantly, undergoing TE improved risk awareness in all participants and prompted contemplation of lifestyle change in most.

### Comparison with existing literature

The utility and acceptability of TE as a risk stratification tool has been well documented, including populations with hepatitis C(10,13,14). The current study builds upon these findings by demonstrating the acceptability of TE to patients with non-viral risk factors, allowing effective risk stratification in patients with both hazardous alcohol use and metabolic conditions.

1  
2  
3 Within the current study, many hazardous alcohol users were unaware that  
4 their alcohol use reached hazardous levels prior to referral for TE. This corroborates  
5 previous qualitative work demonstrating that midlife drinking is heavily governed by  
6 social norms and an association between problem drinking and the inability to fulfil  
7 basic family and work responsibilities(15,16). A lack of patient knowledge may also  
8 result from health care providers' limited understanding about problematic drinking  
9 behaviours. In their qualitative interview study of healthcare professionals who  
10 deliver brief intervention advice for alcohol, Rapley and colleagues demonstrated  
11 that providers were uncertain of what constituted 'at-risk' alcohol intake, resulting in  
12 reduced confidence to provide alcohol consumption advice(17). A lack of risk  
13 awareness did not however seem to preclude uptake of the TE scan in those with  
14 hazardous alcohol use.

15  
16  
17 Strikingly, knowledge that obesity and type 2 diabetes are risk factors for CLD  
18 was uncommon even in patients with these risk factors. Participants with type 2  
19 diabetes frequently reported surprise at receiving an invitation to undergo TE  
20 screening. Wieland and colleagues explored awareness of NAFLD risk in individuals  
21 presenting to an Endocrinology clinic. Of those with significant risk factors (i.e.  
22 overweight/obese and insulin resistant), only 24% were aware of their risk for  
23 developing NAFLD(18). Previous studies have also described a lack of NALFD  
24 specific knowledge amongst primary care providers, leading to the absence of CLD  
25 education during routine diabetes consultations and support courses(19,20). In the  
26 current study, TE screening provided an opportunity to raise awareness of patients'  
27 risk for developing CLD. However, education courses and public health interventions  
28 enhancing knowledge of CLD risk factors in both patients and healthcare  
29 professionals are warranted.

## Implications for practice

The results highlighted several areas within the pathway that may require modification prior to further implementation. Negative feedback about the stratification pathway related to failed liver stiffness acquisition. Although BMI was not formally assessed as part of the qualitative process evaluation, it is worth considering the impact of BMI on stiffness acquisition. In the Community Liver Study, 97% of patients were successfully stratified using a medium-sized probe in primary care(9). However, patients with a body mass index (BMI)  $\geq 35$  kg/m<sup>2</sup> were referred to secondary care to undergo TE with an extra-large (XL) probe. Recent data suggests that use of an XL sized probe on a portable TE device significantly increases the number of valid and reliable readings in patients with a raised BMI(21). Given the increasing rates of overweight and obesity in primary care settings, a community stratification pathway should have both Medium and XL probe sizes available for use to improve successful liver stiffness acquisition rates. Given that patient experiences of undergoing TE in the community will likely be impacted by BMI, future studies should address the subjective experience of patients with a range of BMIs.

Previous behaviour change studies have also demonstrated that numerical biomarker feedback increases lifestyle advice uptake by demonstrating physical damage that patients have caused to themselves(22,23). Within the current study, the utility of the numerical liver stiffness value was variable. Some patients struggled to comprehend the context or scaling of their result whilst others found the specific liver stiffness unit useful as a baseline or comparison point. Feedback to patients could be improved by ensuring a clear and structured explanation of how the result relates to the degree of liver scarring, with the provision of a more comprehensive

1  
2  
3 scale to anchor the feedback. It also seemed that perception of risk for developing  
4  
5 CLD varied as a result of the way in which these liver stiffness values were  
6  
7 explained. Specifically, whilst significantly abnormal results generated short-term  
8  
9 shock and anxiety, less severe or normal results were perceived as 'nothing to worry  
10  
11 about'. Given that all patients were referred for liver assessment based on a  
12  
13 compilation of risk factors, prospective risk for developing CLD should be clearly  
14  
15 conveyed to patients. Providers may therefore benefit from additional training and  
16  
17 guidance in the delivery of TE results to patients.  
18  
19  
20  
21  
22  
23

### 24 25 **Strengths and limitations**

26  
27 This study has several strengths. First, participants were invited to interview  
28  
29 six months to two years following their TE appointment, allowing assessment of  
30  
31 longer-term perceptions about the process whilst minimizing the likelihood that  
32  
33 details of the pathway were forgotten. Additionally, participants were purposively  
34  
35 sampled from inner city and suburban locations, with different CLD risk factors and  
36  
37 CLD diagnoses. It is believed that use of this sampling technique may allow  
38  
39 transferability to similar primary care settings within the United Kingdom.  
40  
41  
42

43 Several limitations to the study have also been noted. It is possible that  
44  
45 engagement with other liver disease services during the period between TE and  
46  
47 interview may have impacted participant recall. Those diagnosed with cirrhosis will  
48  
49 have been referred to secondary care Hepatology services with the remainder  
50  
51 returned to primary care. However, we noted no differences in the identified main  
52  
53 themes between risk groups, just in the subtheme relating to immediate response to  
54  
55 the result. Additionally, the characteristics of the individuals who declined to  
56  
57 participate were not stored following their decline. As a result, it is possible that those  
58  
59  
60

1  
2  
3 who chose not to participate were inherently different to those who participated. As  
4  
5 with most qualitative data collection, the interviewer's presence may have impacted  
6  
7 participant response. Importantly, the interviewer (DH) was involved in the larger  
8  
9 community study and had previously met those participants with elevated liver  
10  
11 stiffness (n=13). To minimise response bias, participants were notified that all  
12  
13 interview transcripts would be anonymised. The reliability and validity of data  
14  
15 collection and analysis were also optimised by including an independent researcher  
16  
17 (MB) in the development of the interview guide and through investigator triangulation  
18  
19 during transcript coding. Whilst attempts were made to represent broader community  
20  
21 populations, two sampling limitations are noted. First, non-English speaking patients  
22  
23 were excluded from the interviews. Liver disease prevalence varies widely among  
24  
25 different ethnic groups, particularly in regards to aetiology and risk of hospitalisation  
26  
27 and mortality(24, 25). Our findings may therefore not generalise to ethnically diverse  
28  
29 populations. Further, the age range of interviewees was relatively narrow (40-71  
30  
31 years). However, this reflects the decades where people are most at risk of  
32  
33 developing CLD, with the average age of death from CLD being 59 years in the  
34  
35 UK(26).  
36  
37  
38  
39  
40  
41  
42  
43  
44

## 45 **Conclusion**

46  
47 In summary, undergoing TE to screen for CLD in the community was acceptable to  
48  
49 most participants and resulted in greater awareness of liver disease risk, regardless  
50  
51 of risk factor. The findings suggest benefits of population-based liver disease  
52  
53 screening in addition to merely earlier diagnoses. Future interventions should target  
54  
55 improved awareness of liver disease risk factors in both patients and providers.  
56  
57  
58  
59  
60

## Author Contributions

DH, GPA, TC, ING, and MB all contributed to the study design. Data collection was completed by DH and MB. Data Analysis was completed by HK, DH, JRM, and MB. HK and DH wrote and revised the current manuscript. Critical revisions to the manuscript were made by HK, DH, JRM, GPA, TC, ING, and MB. All authors have approved the final version.

## Data sharing statement

Redacted data are available upon reasonable request.

## References

1. Williams R, Aspinall R, Bellis M, et al. Addressing liver disease in the UK: a blueprint for attaining excellence in health care and reducing premature mortality from lifestyle issues of excess consumption of alcohol, obesity, and viral hepatitis. *Lancet*. 2014 Nov 29;384(9958):1953–97.
2. Asrani SK, Devarbhavi H, Eaton J, Kamath PS. Burden of liver diseases in the world. *J Hepatol*. 2019 Jan;70(1):151–71.
3. Williams R, Alexander G, Armstrong I, et al. Disease burden and costs from excess alcohol consumption, obesity, and viral hepatitis: fourth report of the Lancet Standing Commission on Liver Disease in the UK. *Lancet*. 2018 Mar 17;391(10125):1097–107.
4. Ratib S, Fleming KM, Crooks CJ, et al. 1 and 5 year survival estimates for people with cirrhosis of the liver in England, 1998–2009: A large population study. *J Hepatol*. 2014 Feb;60(2):282–9.
5. Donnan PT, McLernon D, Dillon JF, et al. Development of a decision support tool for primary care management of patients with abnormal liver function tests without clinically apparent liver disease: a record-linkage population cohort study and decision analysis (ALFIE). *Health Technol Assess*. 2009 Apr;13(25):iii–iv, ix–xi, 1–134.
6. Koehler EM, Schouten JNL, Hansen BE, et al. Prevalence and risk factors of non-alcoholic fatty liver disease in the elderly: results from the Rotterdam study. *J Hepatol*. 2012 Dec;57(6):1305–11.
7. Newsome PN, Cramb R, Davison SM, et al. Guidelines on the management of abnormal liver blood tests. *Gut*. 2018 Jan 1;67(1):6–19.

- 1
  - 2
  - 3
  - 4
  - 5
  - 6
  - 7
  - 8
  - 9
  - 10
  - 11
  - 12
  - 13
  - 14
  - 15
  - 16
  - 17
  - 18
  - 19
  - 20
  - 21
  - 22
  - 23
  - 24
  - 25
  - 26
  - 27
  - 28
  - 29
  - 30
  - 31
  - 32
  - 33
  - 34
  - 35
  - 36
  - 37
  - 38
  - 39
  - 40
  - 41
  - 42
  - 43
  - 44
  - 45
  - 46
  - 47
  - 48
  - 49
  - 50
  - 51
  - 52
  - 53
  - 54
  - 55
  - 56
  - 57
  - 58
  - 59
  - 60
8. Serra-Burriel M, Graupera I, Toran P, et al. Transient elastography for screening of liver fibrosis: Cost-effectiveness analysis from six prospective cohorts in Europe and Asia. *J Hepatol*. 2019 Dec;71(6):1141–51.
  9. Harman DJ, Ryder SD, James MW, et al. Direct targeting of risk factors significantly increases the detection of liver cirrhosis in primary care: a cross-sectional diagnostic study utilising transient elastography. *BMJ Open*. 2015 May 1;5(4):e007516.
  10. Chalmers J, Wilkes E, Harris R, et al. Development and implementation of a commissioned pathway for the identification and stratification of liver disease in the community. *Frontline Gastroenterol*. 2019 Jun 26;flgastro-2019-101177.
  11. Braun V, Clarke V. Using thematic analysis in psychology. *Qual Res Psychol*. 2006 Jan 1;3(2):77–101.
  12. Pope C, Ziebland S, Mays N. Qualitative research in health care. Analysing qualitative data. *BMJ*. 2000 Jan 8;320(7227):114–6.
  13. Vuppalanchi R, Siddiqui MS, Natta MLV, et al. Performance characteristics of vibration-controlled transient elastography for evaluation of nonalcoholic fatty liver disease. *Hepatology*. 2018;67(1):134–44.
  14. Marshall AD, Micallef M, Erratt A, et al. Liver disease knowledge and acceptability of non-invasive liver fibrosis assessment among people who inject drugs in the drug and alcohol setting: The LiveRLife Study. *Int J Drug Policy*. 2015 Oct;26(10):984–91.
  15. Emslie C, Hunt K, Lyons A. Older and wiser? Men's and women's accounts of drinking in early mid-life. *Sociol Health Illn*. 2012;34(4):481–96.
  16. Parke H, Michalska M, Russell A, et al. Understanding drinking among midlife men in the United Kingdom: A systematic review of qualitative studies. *Addict Behav Rep*. 2018 Dec 1;8:85–94.
  17. Rapley T, May C, Frances Kaner E. Still a difficult business? Negotiating alcohol-related problems in general practice consultations. *Soc Sci Med*. 2006 Nov;63(9):2418–28.
  18. Wieland AC, Mettler P, McDermott MT, et al. Low Awareness of Nonalcoholic Fatty Liver Disease Among Patients at High Metabolic Risk. *J Clin Gastroenterol*. 2015 Jan;49(1):e6.
  19. Bergqvist C-J, Skoien R, Horsfall L, et al. Awareness and opinions of non-alcoholic fatty liver disease by hospital specialists. *Intern Med J*. 2013 Mar;43(3):247–53.
  20. Grattagliano I, D'Ambrosio G, Palmieri VO, et al. Improving nonalcoholic fatty liver disease management by general practitioners: a critical evaluation and impact of an educational training program. *J Gastrointest Liver Dis*. 2008 Dec;17(4):389–94.



- 1
  - 2
  - 3
  - 4
  - 5
  - 6
  - 7
  - 8
  - 9
  - 10
  - 11
  - 12
  - 13
  - 14
  - 15
  - 16
  - 17
  - 18
  - 19
  - 20
  - 21
  - 22
  - 23
  - 24
  - 25
  - 26
  - 27
  - 28
  - 29
  - 30
  - 31
  - 32
  - 33
  - 34
  - 35
  - 36
  - 37
  - 38
  - 39
  - 40
  - 41
  - 42
  - 43
  - 44
  - 45
  - 46
  - 47
  - 48
  - 49
  - 50
  - 51
  - 52
  - 53
  - 54
  - 55
  - 56
  - 57
  - 58
  - 59
  - 60
21. Harris R, Card TR, Delahooke T, et al. The XL probe: A luxury or a necessity? Risk stratification in an obese community cohort using transient elastography. *United European Gastroenterol J*. 2018 Nov;6(9):1372–9.
22. Bovet P, Perret F, Cornuz J, et al. Improved smoking cessation in smokers given ultrasound photographs of their own atherosclerotic plaques. *Prev Med*. 2002 Feb;34(2):215–20.
23. Parkes G, Greenhalgh T, Griffin M, Dent R. Effect on smoking quit rate of telling patients their lung age: the Step2quit randomised controlled trial. *BMJ*. 2008 Mar 15;336(7644):598–600.
24. Bhala N, Cézard G, Ward HJT, et al. Ethnic Variations in Liver- and Alcohol-Related Disease Hospitalisations and Mortality: The Scottish Health and Ethnicity Linkage Study. *Alcohol Alcohol*. 2016 Sep 1;51(5):593–601.
25. Setiawan VW, Stram DO, Porcel J, et al. Prevalence of chronic liver disease and cirrhosis by underlying cause in understudied ethnic groups: The multiethnic cohort. *Hepatology*. 2016;64(6):1969–77.
26. Public Health England. Liver disease: Applying all our health [Internet]. Gov.UK; 2015. Available from: <https://www.gov.uk/government/publications/liver-disease-applying-all-our-health/liver-disease-applying-all-our-health>



## APPENDIX 1: Interview Guide

### *Prior knowledge of liver disease/views of health:*

- Before being contacted about the liver tests, how would you describe your health?
- Can you tell me what you knew about the risks of excessive alcohol consumption/diabetes? (probe to ask about liver disease if not mentioned by participant)
- Ask about patient's own risk – alcohol consumption/diabetes control pre-scan?
- Had you intended to make any attempts to improve your lifestyle/health prior to the liver tests? (probe to ask why/why no prior attempts). If so, what did you do? What triggered the previous lifestyle changes?
- Who contacted you about having tests to check your liver function?
- What information did you receive about the scan before having it?
- Did you understand why you were contacted to have the scan done?
- How did you feel about being contacted?

### *Scan experience and results:*

- When did you have the liver scan done?
- Please take me through what you remember about having the liver scan done?
- How would you describe your feelings about having this test done?
- Did you understand what the scan was looking for?
- Can you tell me about your results from the liver scan? Probe around who discussed the results and were they explained clearly?
- Have you remembered the number result (liver stiffness) that the scan produced? If so, did this result mean anything to you?
- How did the scan results make you feel at the time?

### *Current Health Beliefs:*

- Did having the liver tests have an impact on how you view your health?
- Since having the tests, is there anything you have learned about liver disease?
- To what extent have your health beliefs changed since having the liver scan?
- To what extent has information from the doctors or nurses had a role in changing how you view your health?
- Has the scan prompted you to make lifestyle changes?

## Standards for Reporting Qualitative Research (SRQR)\*

<http://www.equator-network.org/reporting-guidelines/srqr/>

Page/line no(s).

### Title and abstract

|                                                                                                                                                                                                                                                              |            |
|--------------------------------------------------------------------------------------------------------------------------------------------------------------------------------------------------------------------------------------------------------------|------------|
| <p><b>Title</b> - Concise description of the nature and topic of the study Identifying the study as qualitative or indicating the approach (e.g., ethnography, grounded theory) or data collection methods (e.g., interview, focus group) is recommended</p> | <p>1</p>   |
| <p><b>Abstract</b> - Summary of key elements of the study using the abstract format of the intended publication; typically includes background, purpose, methods, results, and conclusions</p>                                                               | <p>3-4</p> |

### Introduction

|                                                                                                                                                                     |          |
|---------------------------------------------------------------------------------------------------------------------------------------------------------------------|----------|
| <p><b>Problem formulation</b> - Description and significance of the problem/phenomenon studied; review of relevant theory and empirical work; problem statement</p> | <p>5</p> |
| <p><b>Purpose or research question</b> - Purpose of the study and specific objectives or questions</p>                                                              | <p>6</p> |

### Methods

|                                                                                                                                                                                                                                                                                                                                                                                                             |                                                                                                               |
|-------------------------------------------------------------------------------------------------------------------------------------------------------------------------------------------------------------------------------------------------------------------------------------------------------------------------------------------------------------------------------------------------------------|---------------------------------------------------------------------------------------------------------------|
| <p><b>Qualitative approach and research paradigm</b> - Qualitative approach (e.g., ethnography, grounded theory, case study, phenomenology, narrative research) and guiding theory if appropriate; identifying the research paradigm (e.g., postpositivist, constructivist/ interpretivist) is also recommended; rationale**</p>                                                                            | <p>6 &amp; 8 (design section &amp; data analysis section)</p>                                                 |
| <p><b>Researcher characteristics and reflexivity</b> - Researchers' characteristics that may influence the research, including personal attributes, qualifications/experience, relationship with participants, assumptions, and/or presuppositions; potential or actual interaction between researchers' characteristics and the research questions, approach, methods, results, and/or transferability</p> | <p>7, 8 &amp; 20 (data collection section, data analysis section &amp; strengths and limitations section)</p> |
| <p><b>Context</b> - Setting/site and salient contextual factors; rationale**</p>                                                                                                                                                                                                                                                                                                                            | <p>6 to 8</p>                                                                                                 |
| <p><b>Sampling strategy</b> - How and why research participants, documents, or events were selected; criteria for deciding when no further sampling was necessary (e.g., sampling saturation); rationale**</p>                                                                                                                                                                                              | <p>6 to 8</p>                                                                                                 |
| <p><b>Ethical issues pertaining to human subjects</b> - Documentation of approval by an appropriate ethics review board and participant consent, or explanation for lack thereof; other confidentiality and data security issues</p>                                                                                                                                                                        | <p>7 &amp; 8 (design section and data collection section)</p>                                                 |
| <p><b>Data collection methods</b> - Types of data collected; details of data collection procedures including (as appropriate) start and stop dates of data collection and analysis, iterative process, triangulation of sources/methods, and modification of procedures in response to evolving study findings; rationale**</p>                                                                             | <p>7 &amp; 8 (design section and data collection section)</p>                                                 |

|                                                                                                                                                                                                                                                       |                                                                    |
|-------------------------------------------------------------------------------------------------------------------------------------------------------------------------------------------------------------------------------------------------------|--------------------------------------------------------------------|
| <b>Data collection instruments and technologies</b> - Description of instruments (e.g., interview guides, questionnaires) and devices (e.g., audio recorders) used for data collection; if/how the instrument(s) changed over the course of the study | <b>7 &amp; 8 (data collection and interview procedure section)</b> |
| <b>Units of study</b> - Number and relevant characteristics of participants, documents, or events included in the study; level of participation (could be reported in results)                                                                        | <b>9 (participants section) and Table 1</b>                        |
| <b>Data processing</b> - Methods for processing data prior to and during analysis, including transcription, data entry, data management and security, verification of data integrity, data coding, and anonymization/de-identification of excerpts    | <b>8 (data collection and data analysis section)</b>               |
| <b>Data analysis</b> - Process by which inferences, themes, etc., were identified and developed, including the researchers involved in data analysis; usually references a specific paradigm or approach; rationale**                                 | <b>8 (data analysis section)</b>                                   |
| <b>Techniques to enhance trustworthiness</b> - Techniques to enhance trustworthiness and credibility of data analysis (e.g., member checking, audit trail, triangulation); rationale**                                                                | <b>8 (analysis section)</b>                                        |

### Results/findings

|                                                                                                                                                                                                   |             |
|---------------------------------------------------------------------------------------------------------------------------------------------------------------------------------------------------|-------------|
| <b>Synthesis and interpretation</b> - Main findings (e.g., interpretations, inferences, and themes); might include development of a theory or model, or integration with prior research or theory | <b>9-16</b> |
| <b>Links to empirical data</b> - Evidence (e.g., quotes, field notes, text excerpts, photographs) to substantiate analytic findings                                                               | <b>9-16</b> |

### Discussion

|                                                                                                                                                                                                                                                                                                                                                                                                             |                                                        |
|-------------------------------------------------------------------------------------------------------------------------------------------------------------------------------------------------------------------------------------------------------------------------------------------------------------------------------------------------------------------------------------------------------------|--------------------------------------------------------|
| <b>Integration with prior work, implications, transferability, and contribution(s) to the field</b> - Short summary of main findings; explanation of how findings and conclusions connect to, support, elaborate on, or challenge conclusions of earlier scholarship; discussion of scope of application/generalizability; identification of unique contribution(s) to scholarship in a discipline or field | <b>16-20</b>                                           |
| <b>Limitations</b> - Trustworthiness and limitations of findings                                                                                                                                                                                                                                                                                                                                            | <b>20 &amp; 21 (strengths and limitations section)</b> |

### Other

|                                                                                                                                               |          |
|-----------------------------------------------------------------------------------------------------------------------------------------------|----------|
| <b>Conflicts of interest</b> - Potential sources of influence or perceived influence on study conduct and conclusions; how these were managed | <b>2</b> |
| <b>Funding</b> - Sources of funding and other support; role of funders in data collection, interpretation, and reporting                      | <b>2</b> |

1 \*The authors created the SRQR by searching the literature to identify guidelines, reporting  
2 standards, and critical appraisal criteria for qualitative research; reviewing the reference  
3 lists of retrieved sources; and contacting experts to gain feedback. The SRQR aims to  
4 improve the transparency of all aspects of qualitative research by providing clear standards  
5 for reporting qualitative research.  
6  
7

8 \*\*The rationale should briefly discuss the justification for choosing that theory, approach,  
9 method, or technique rather than other options available, the assumptions and limitations  
10 implicit in those choices, and how those choices influence study conclusions and  
11 transferability. As appropriate, the rationale for several items might be discussed together.  
12

13  
14 **Reference:**

15 O'Brien BC, Harris IB, Beckman TJ, Reed DA, Cook DA. **Standards for reporting qualitative**  
16 **research: a synthesis of recommendations.** *Academic Medicine*, Vol. 89, No. 9 / Sept 2014  
17 DOI: 10.1097/ACM.0000000000000388  
18  
19  
20  
21  
22  
23  
24  
25  
26  
27  
28  
29  
30  
31  
32  
33  
34  
35  
36  
37  
38  
39  
40  
41  
42  
43  
44  
45  
46  
47  
48  
49  
50  
51  
52  
53  
54  
55  
56  
57  
58  
59  
60
